# Supplementary material
Source: PubMed Central journal article supplement (PMC3293398)
Supplement: NIHMS354199-supplement-2_si_002.pdf [file NIHMS354199-supplement-2_si_002.pdf]

## Supporting Information

Metacridamides A and B, macrocycles from conidia of the entomopathogenic fungus  
*Metarhizium acridum*

Stuart B. Krasnoff,<sup>\*†</sup> Ulrich Englisch,<sup>‡</sup> Paula G. Miller,<sup>§</sup> Michael L. Shuler,<sup>§</sup> Raymond P. Glahn,<sup>†</sup> Bruno G. G. Donzelli,<sup>⊥</sup> and Donna M. Gibson<sup>†</sup>

<sup>†</sup>USDA-ARS-Biological IPM Research Unit, Ithaca, New York

<sup>‡</sup>The Cornell High Energy Synchrotron Source, Ithaca, NY

<sup>§</sup>Department of Biomedical Engineering, Cornell University, Ithaca NY

<sup>⊥</sup>Department of Plant Pathology, Cornell University, Ithaca, NY

---

### CONTENTS:

- Figure S1.** <sup>1</sup>H NMR of Metacridamide A (**1**) (CDCl<sub>3</sub>, 600 MHz).  
**Figure S2-5.** <sup>1</sup>H NMR of **1** (CDCl<sub>3</sub>, 600 MHz), expanded.  
**Figure S6** <sup>13</sup>C NMR of **1** (CDCl<sub>3</sub>, 150 MHz).  
**Figure S7-10.** <sup>13</sup>C NMR of **1** (CDCl<sub>3</sub>, 150 MHz), expanded.  
**Figure S11.** DQF-COSY of **1** (CDCl<sub>3</sub>, 600 MHz).  
**Figure S12.** DQF-COSY of **1** (CDCl<sub>3</sub>, 600 MHz) detail showing three similar structural units.  
**Figure S13.** HSQC of **1** (CDCl<sub>3</sub>, 600 MHz).  
**Figure S14.** HSQC of **1** (CDCl<sub>3</sub>, 600 MHz) detail showing three similar structural units.  
**Figure S15.** HMBC of **1** (CDCl<sub>3</sub>, 600 MHz).  
**Figure S16.** HMBC of **1** (CDCl<sub>3</sub>, 600 MHz) showing 5-bond correlations.  
**Figure S17.** ROESY of **1** (CDCl<sub>3</sub>, 600 MHz).  
**Figure S18.** <sup>1</sup>H NMR of Metacridamide B (**2**) (CD<sub>3</sub>OD, 600 MHz).  
**Figure S19-23.** <sup>1</sup>H NMR of **2** (CD<sub>3</sub>OD, 600 MHz), expanded.  
**Figure S24** <sup>13</sup>C NMR of **2** (CD<sub>3</sub>OD, 125 MHz).  
**Figure S25-27.** <sup>13</sup>C NMR of **2** (CD<sub>3</sub>OD, 125 MHz), expanded.  
**Figure S28.** COSY of **2** (CD<sub>3</sub>OD, 600 MHz).  
**Figure S29.** COSY of **2** (CD<sub>3</sub>OH, 600 MHz) detail showing amide proton correlations.  
**Figure S30.** HSQC of **2** (CD<sub>3</sub>OD, 600 MHz).  
**Figure S31.** HMBC of **2** (CD<sub>3</sub>OD, 600 MHz).  
**Figure S32.** HMBC of **2** (CD<sub>3</sub>OD, 600 MHz) detail showing 5-bond correlations.  
**Figure S33.** HMBC of **2** (CD<sub>3</sub>OH, 600 MHz) detail showing amide proton correlations.  
**Figure S34.** ROESY of **2** (CD<sub>3</sub>OD, 600 MHz).  
**Figure S35.** Chiral HPLC amino acid analysis of metacridamide A (**1**).  
**Figure S36.** Selected ROESY correlations for metacridamide A (**1**).

- Figure S37.** Interatomic distances (Å) from a model (Chem 3D Pro®) of the crystal structure of metacridamide A (**1**) for selected proton pairs that exhibited ROESY correlations.
- Figure S38.** Conformers (A-C) generated by rotating the  $\alpha$ - $\beta$  and  $\beta$ - $\gamma$  bonds of the Phe unit in the crystal structure model of metacridamide A (**1**).
- Table S1.** Crystal data and structure refinement for metacridamide A (**1**).
- Table S2.** Atomic coordinates ( $\times 10^4$ ) and equivalent isotropic displacement parameters ( $\text{Å}^2 \times 10^3$ ) for metacridamide A (**1**).
- Table S3.** Summary of interatomic distances (Å) for indicated proton pairs in the crystal structure of metacridamide A(**1**) and in models of conformers A-C.

**Figure S1.**  $^1\text{H}$  NMR of Metacridamide A (**1**) ( $\text{CDCl}_3$ , 600 MHz).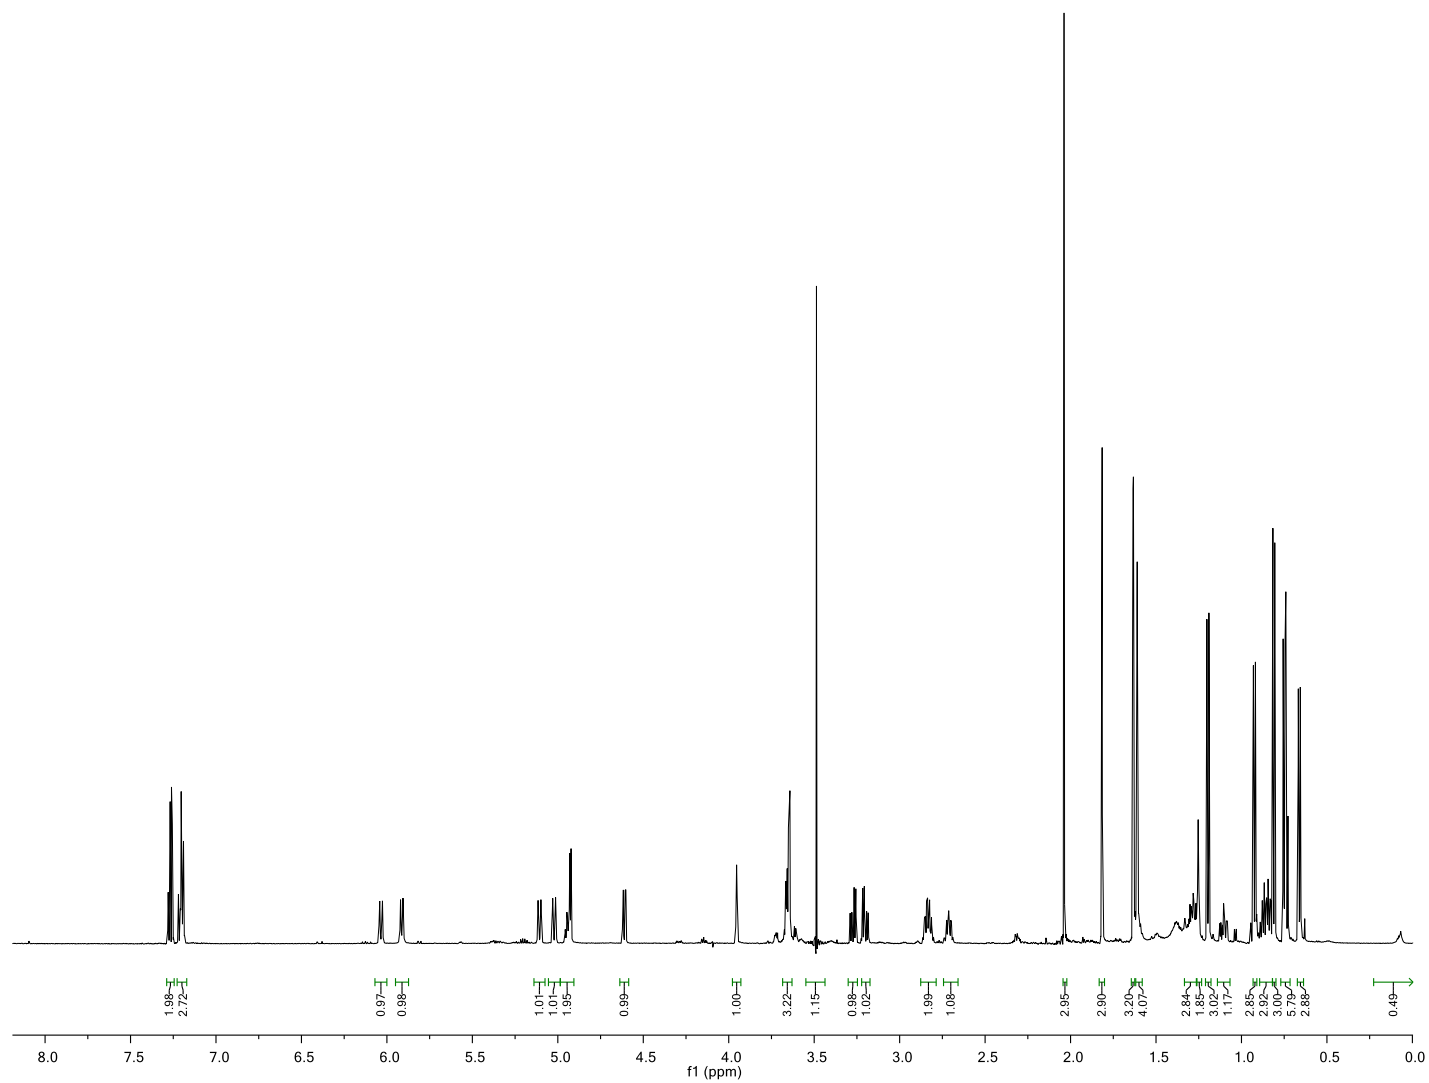

**Figure S2**  $^1\text{H}$  NMR of **1** ( $\text{CDCl}_3$ , 600 MHz), expanded.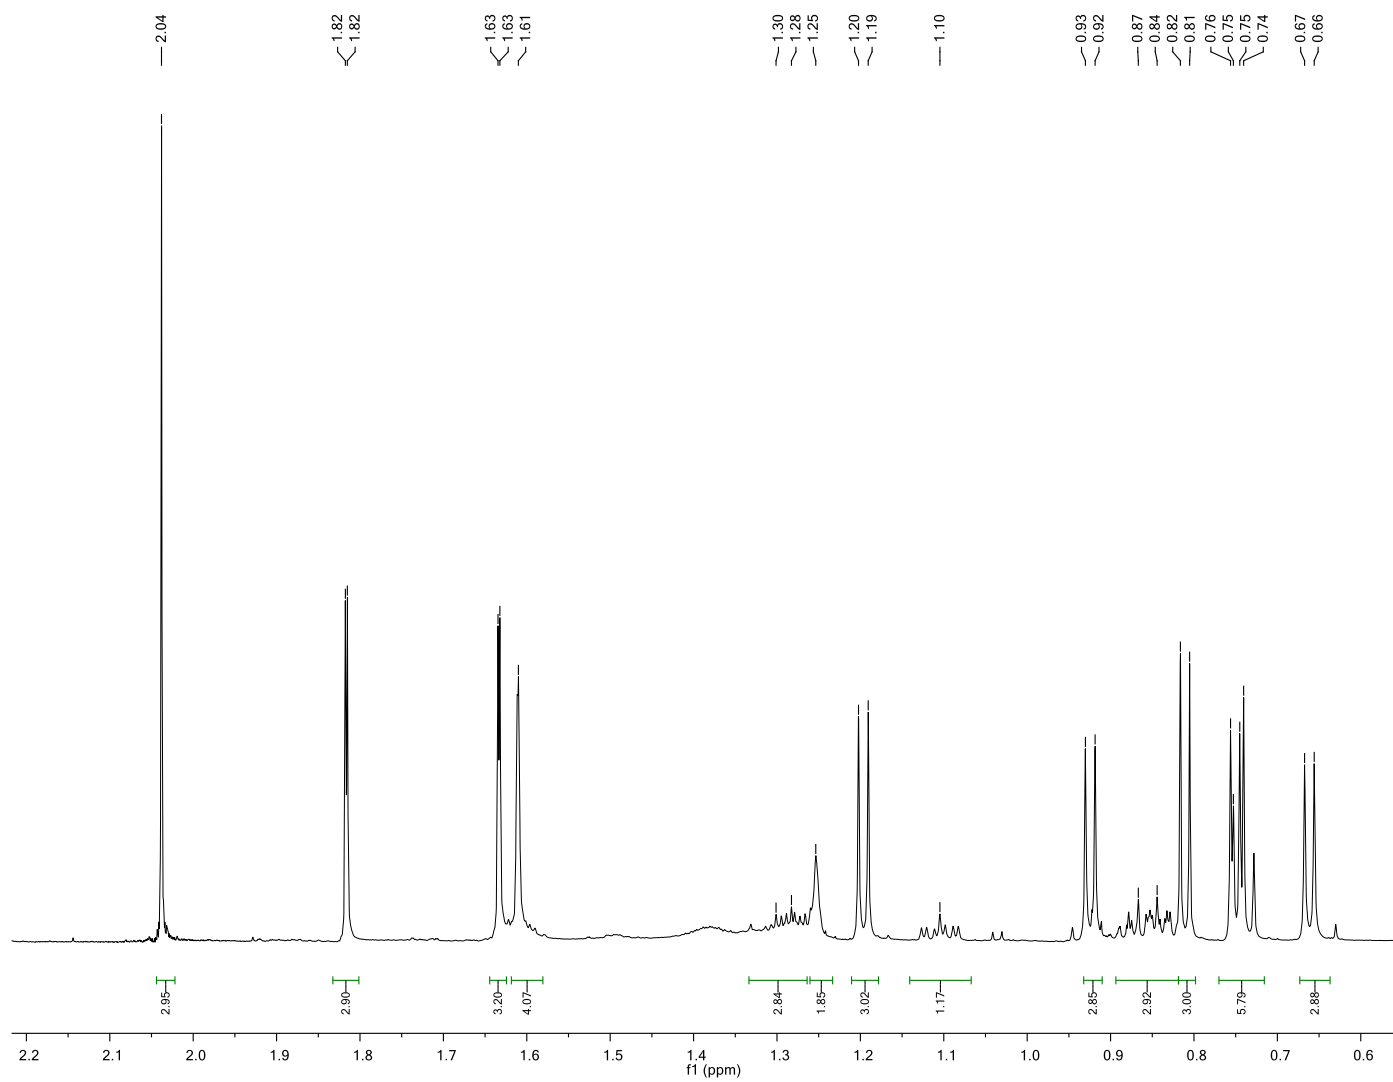

**Figure S3.**  $^1\text{H}$  NMR of **1** ( $\text{CDCl}_3$ , 600 MHz), expanded.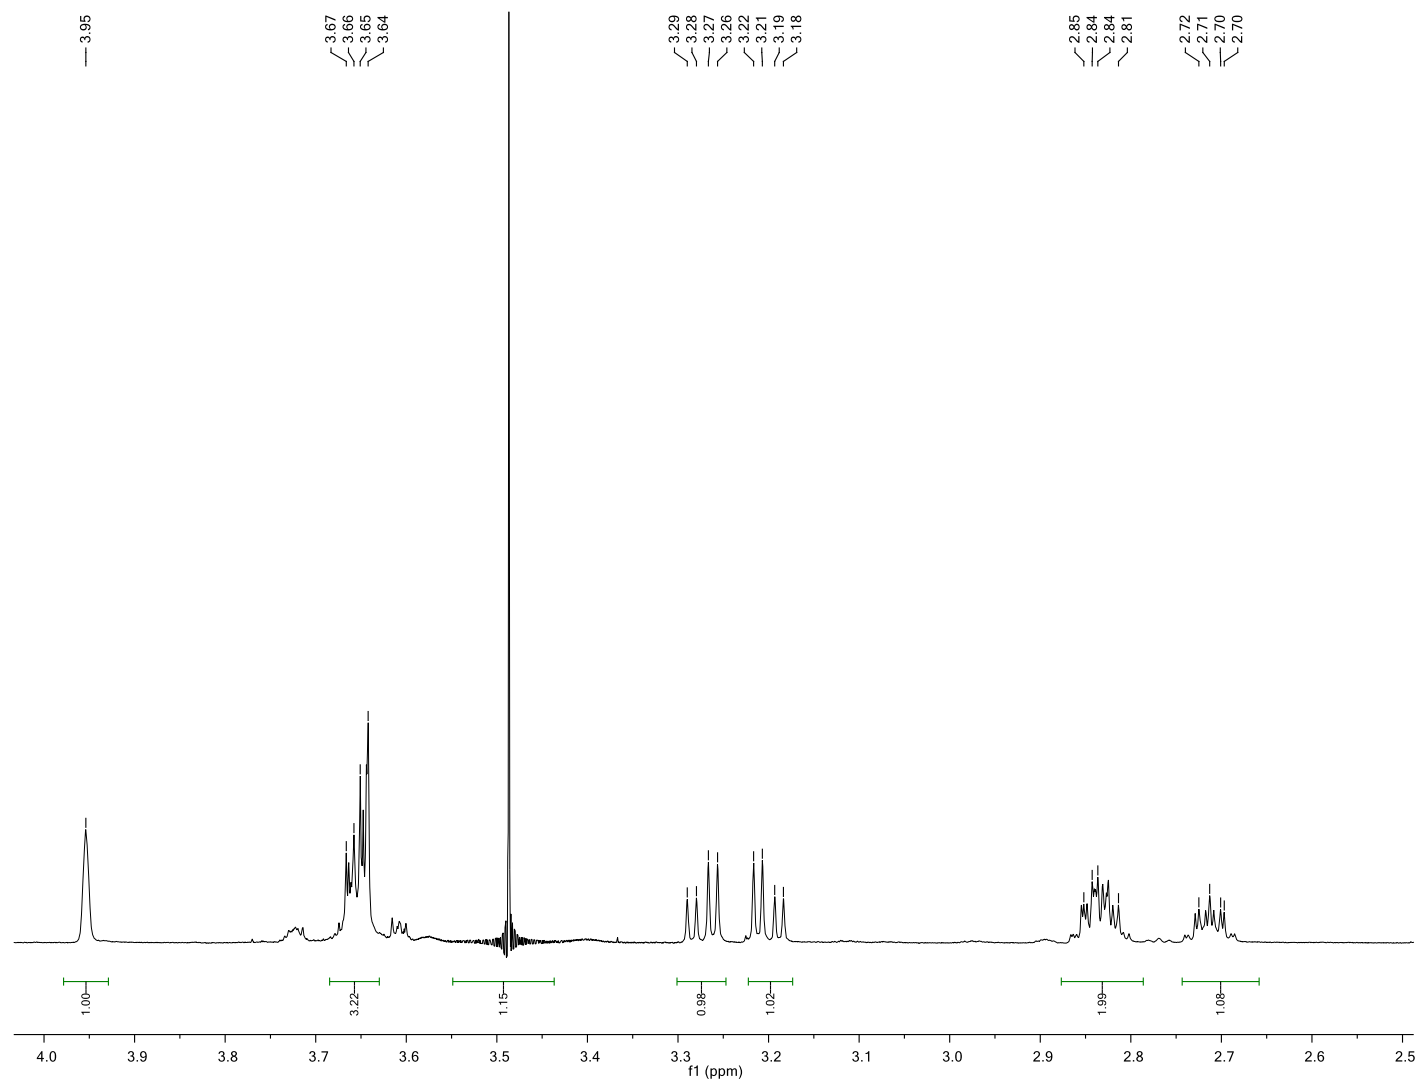

Figure S4.  $^1\text{H}$  NMR of **1** ( $\text{CDCl}_3$ , 600 MHz), expanded.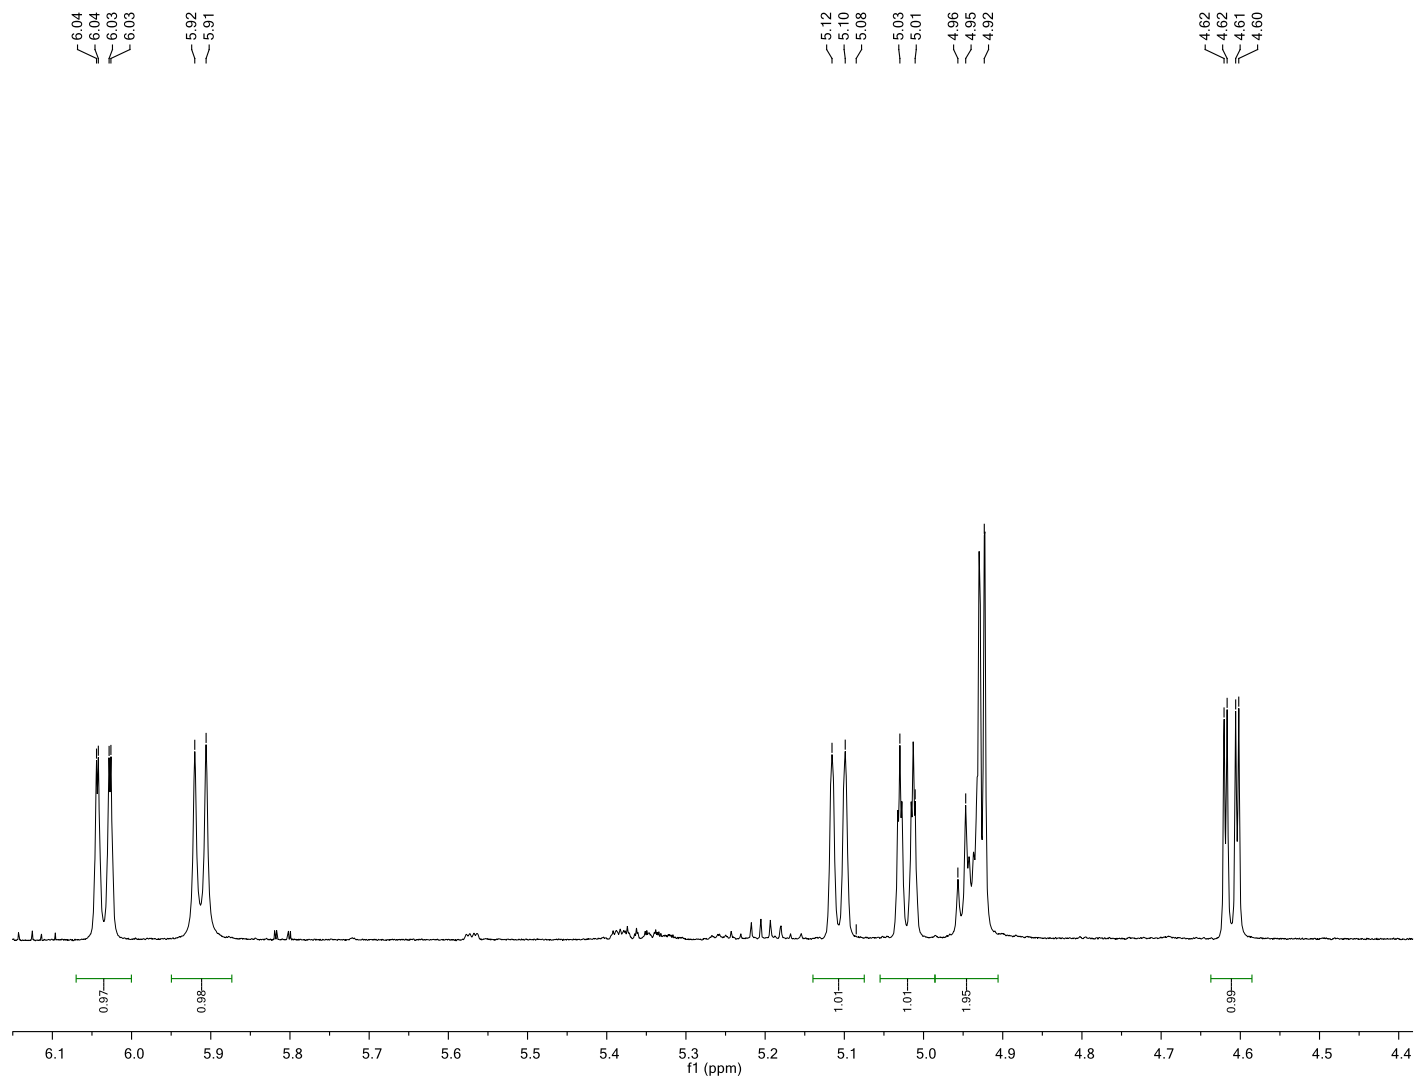

Figure S5.  $^1\text{H}$  NMR of **1** ( $\text{CDCl}_3$ , 600 MHz), expanded.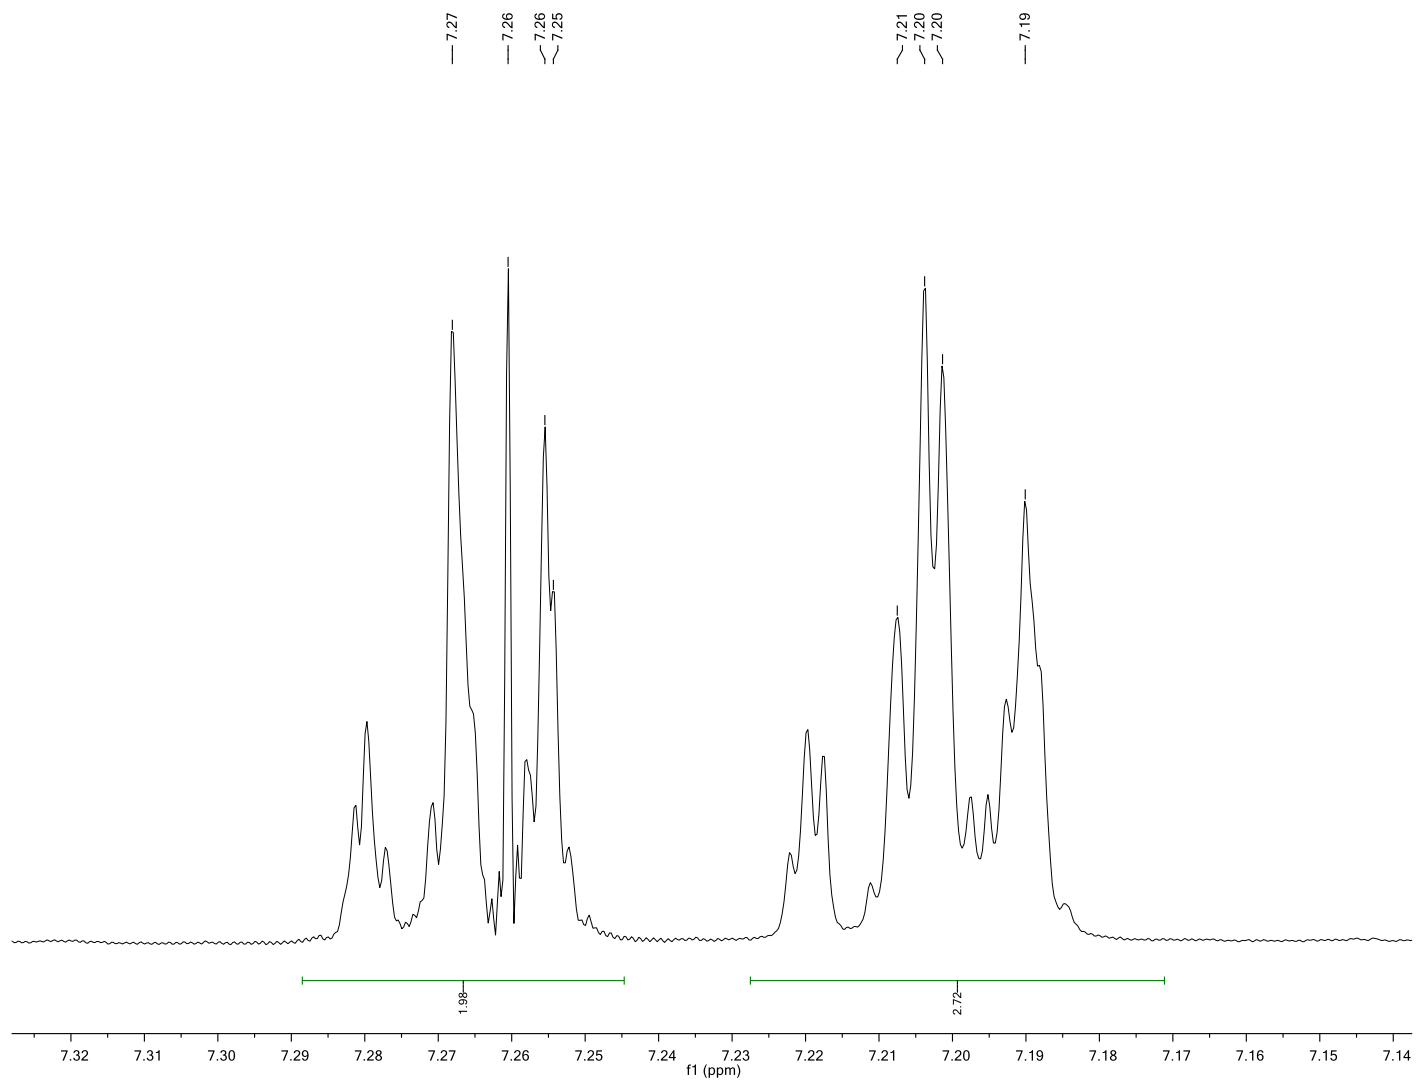

**Figure S6.**  $^{13}\text{C}$  NMR of **1** ( $\text{CDCl}_3$ , 150 MHz).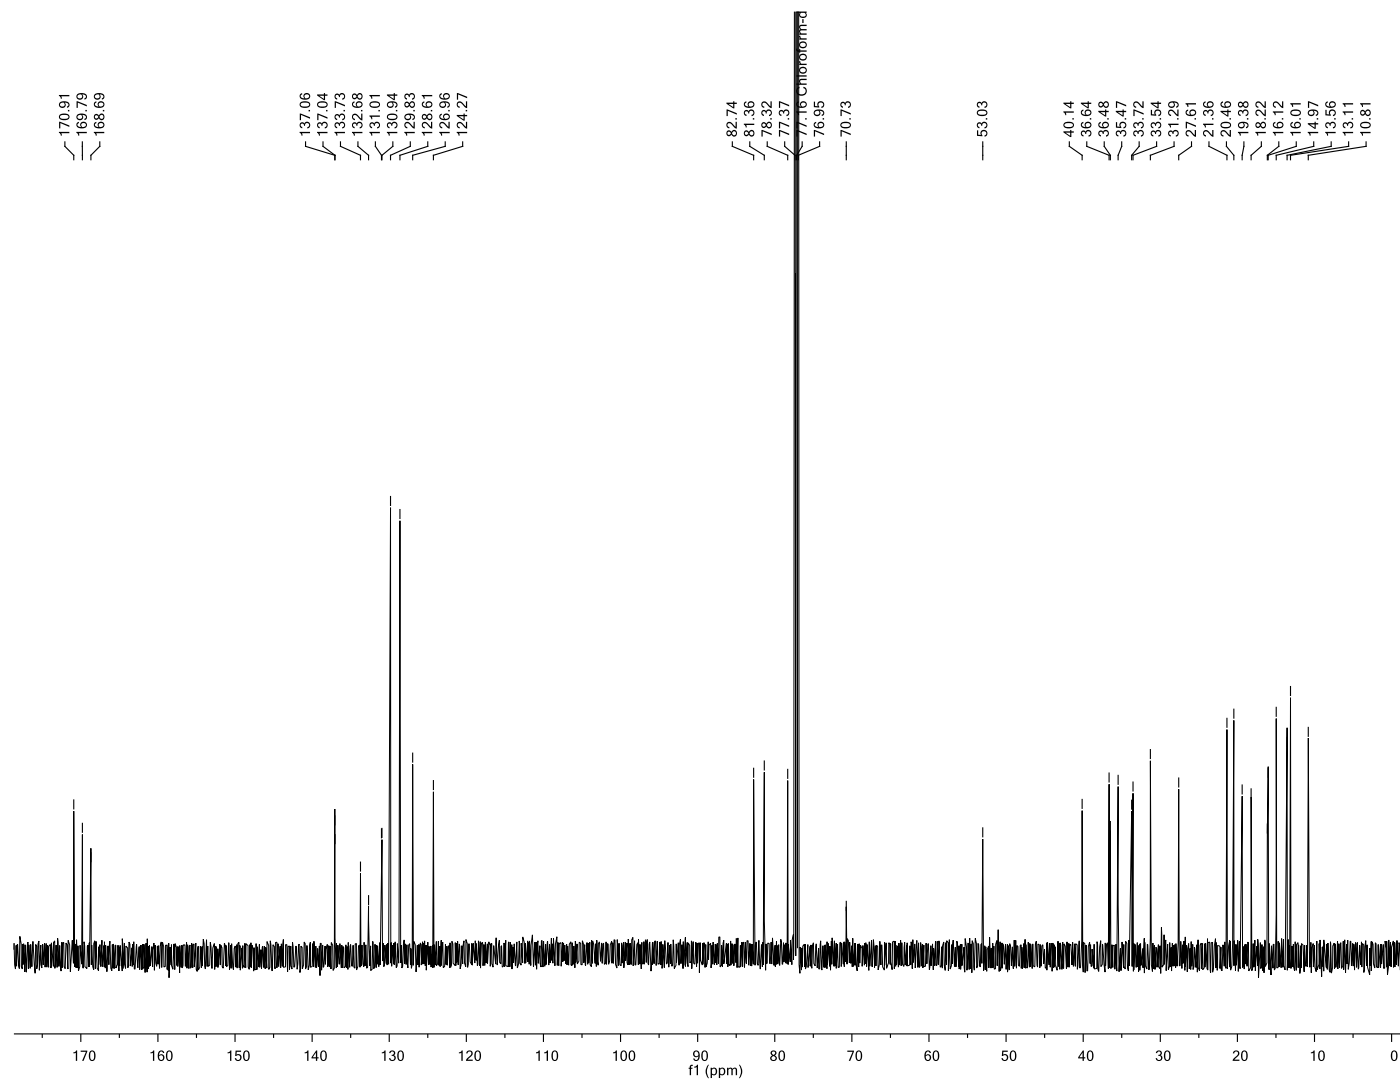



**Figure S7.**  $^{13}\text{C}$  NMR of **1** ( $\text{CDCl}_3$ , 150 MHz), expanded.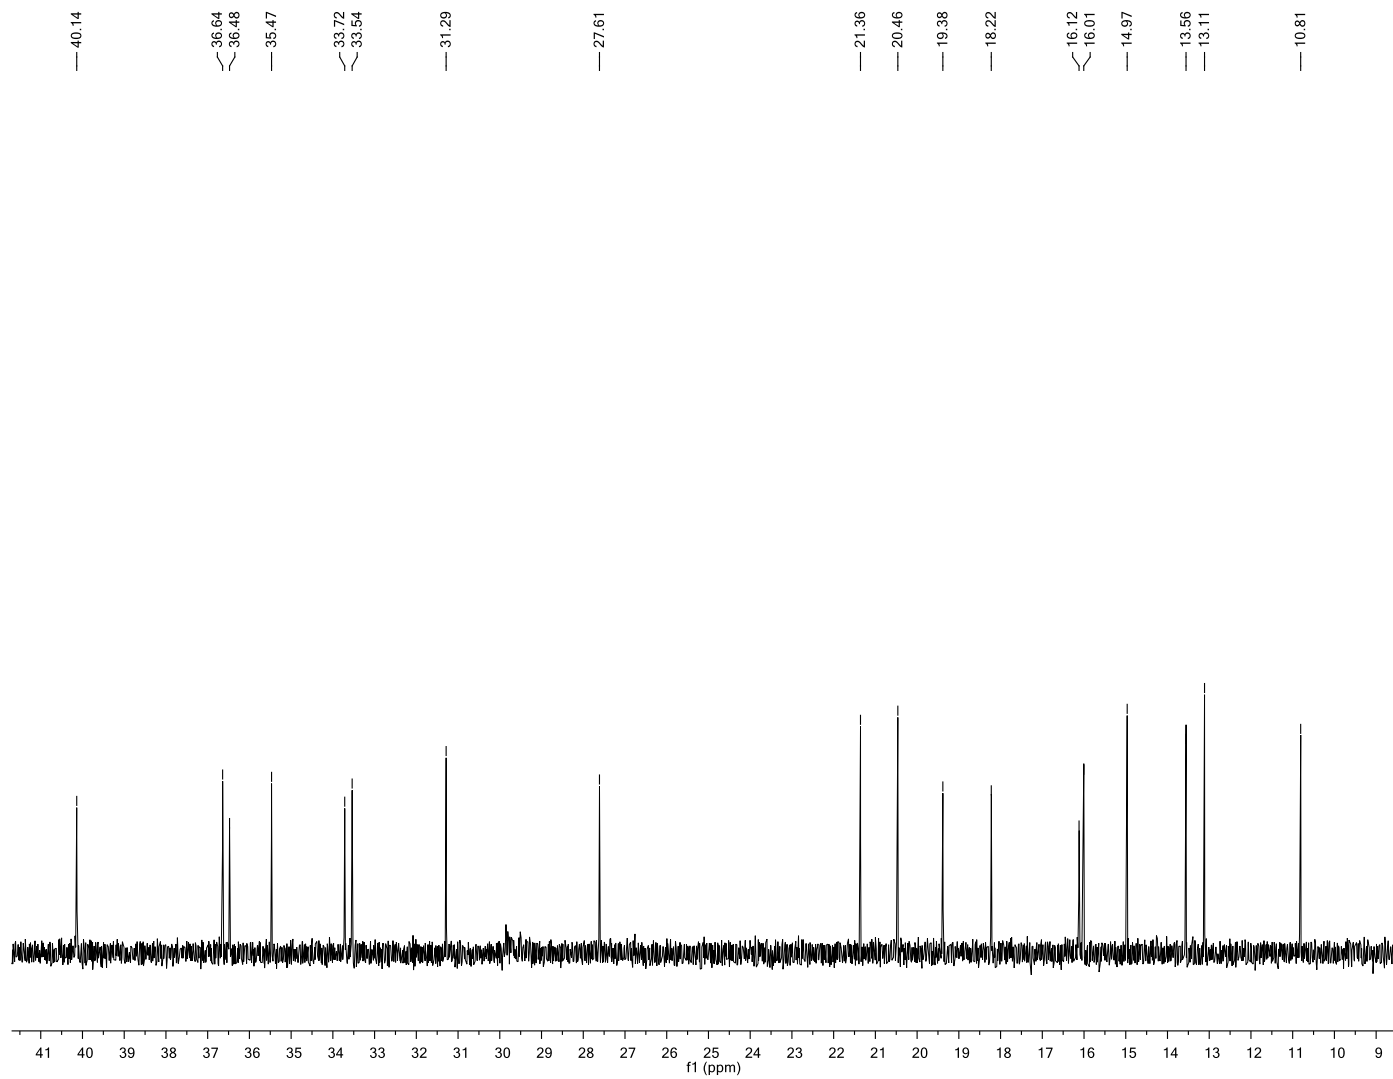

**Figure S8.**  $^{13}\text{C}$  NMR of **1** ( $\text{CDCl}_3$ , 150 MHz), expanded.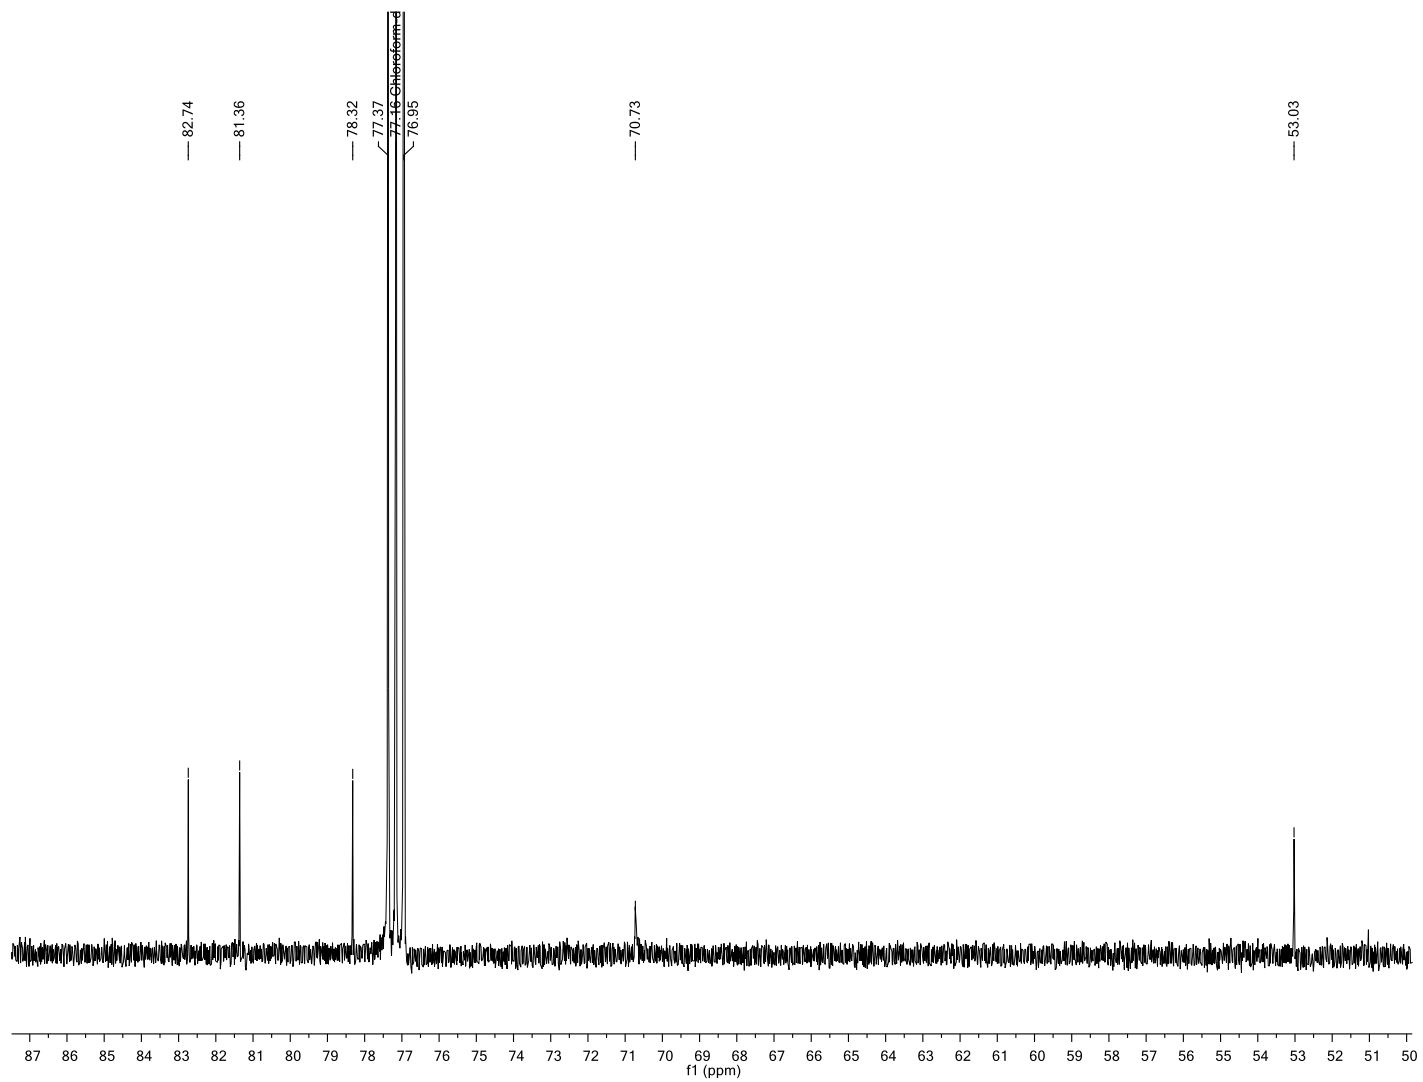

**Figure S9.**  $^{13}\text{C}$  NMR of **1** ( $\text{CDCl}_3$ , 150 MHz), expanded.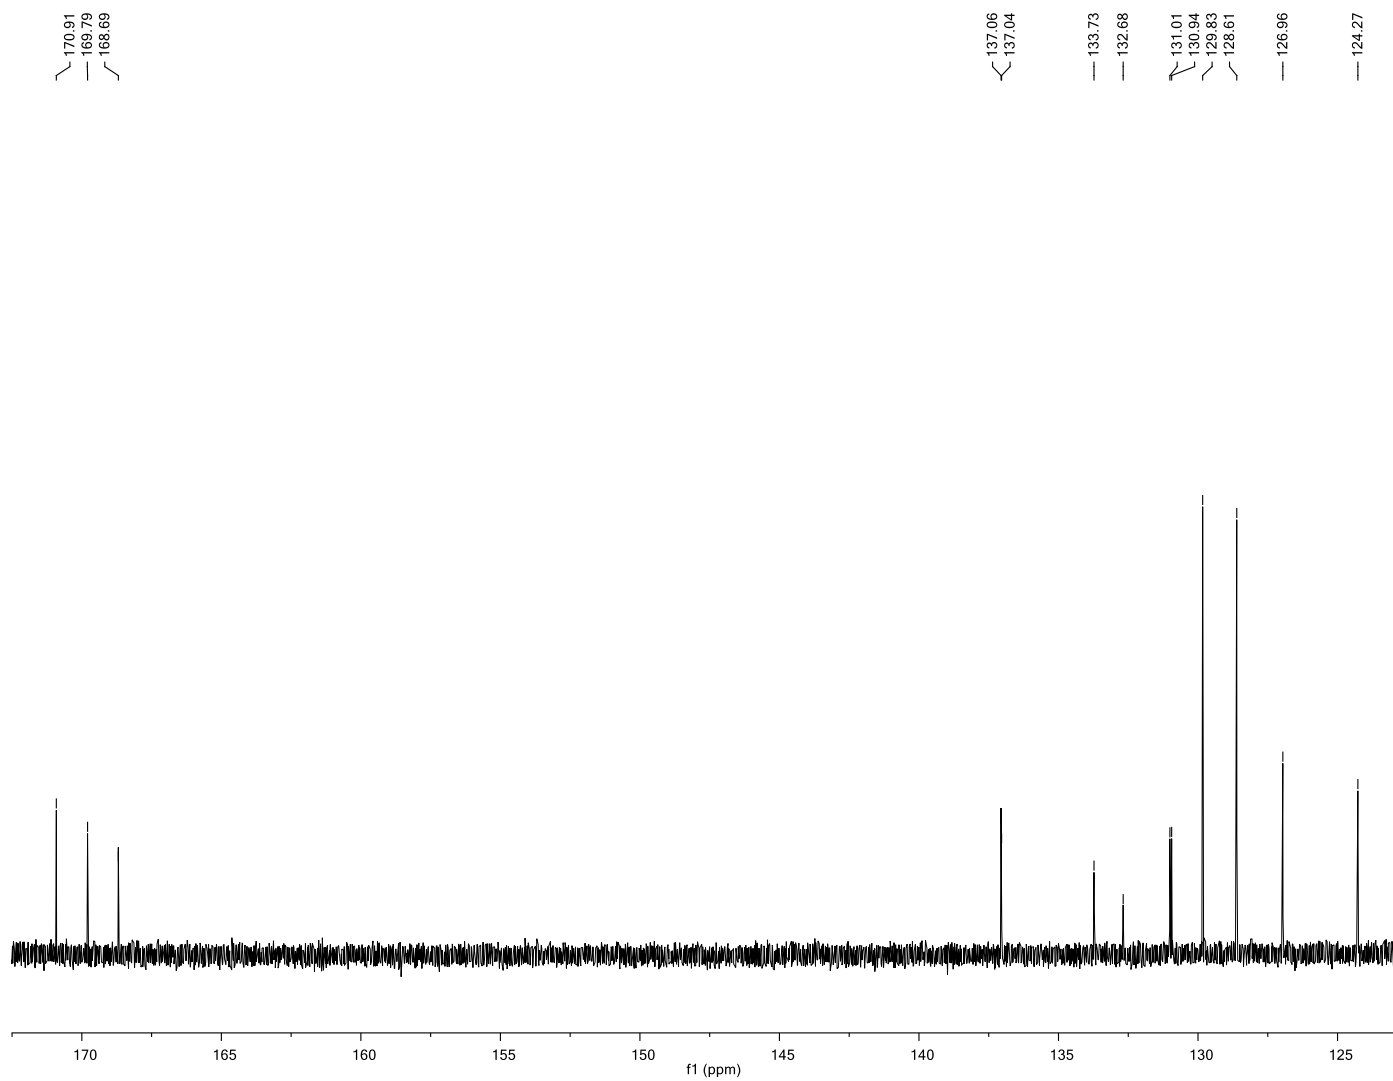

**Figure S10.**  $^{13}\text{C}$  NMR of **1** ( $\text{CDCl}_3$ , 150 MHz), expanded.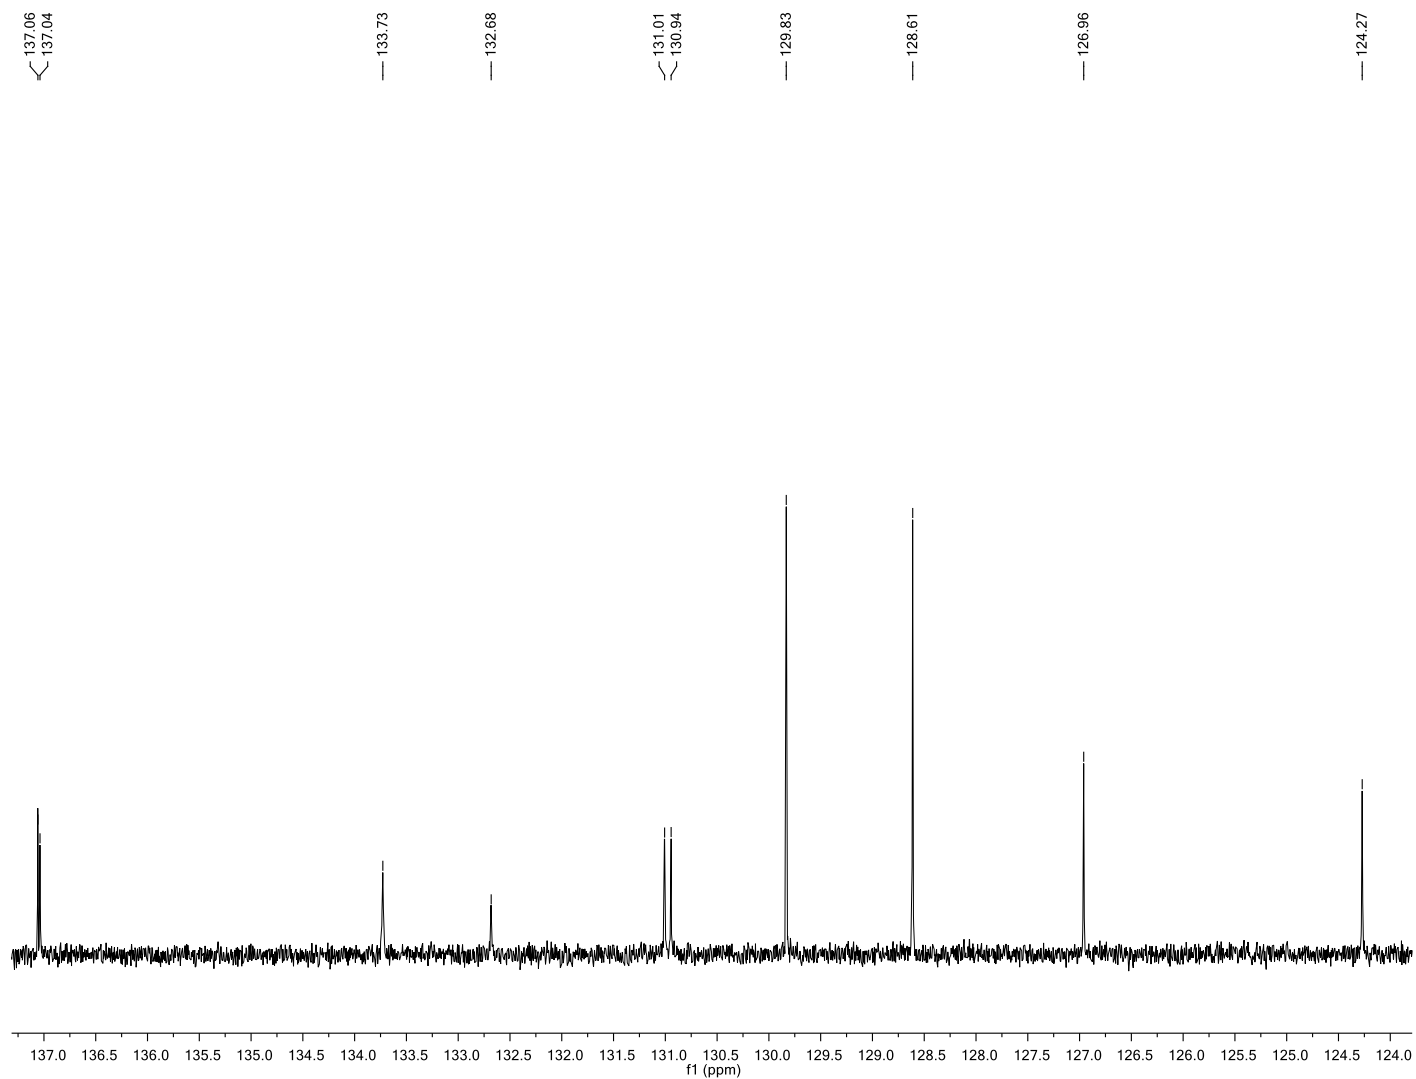

**Figure S11.** DQF-COSY of **1** (CDCl<sub>3</sub>, 600 MHz).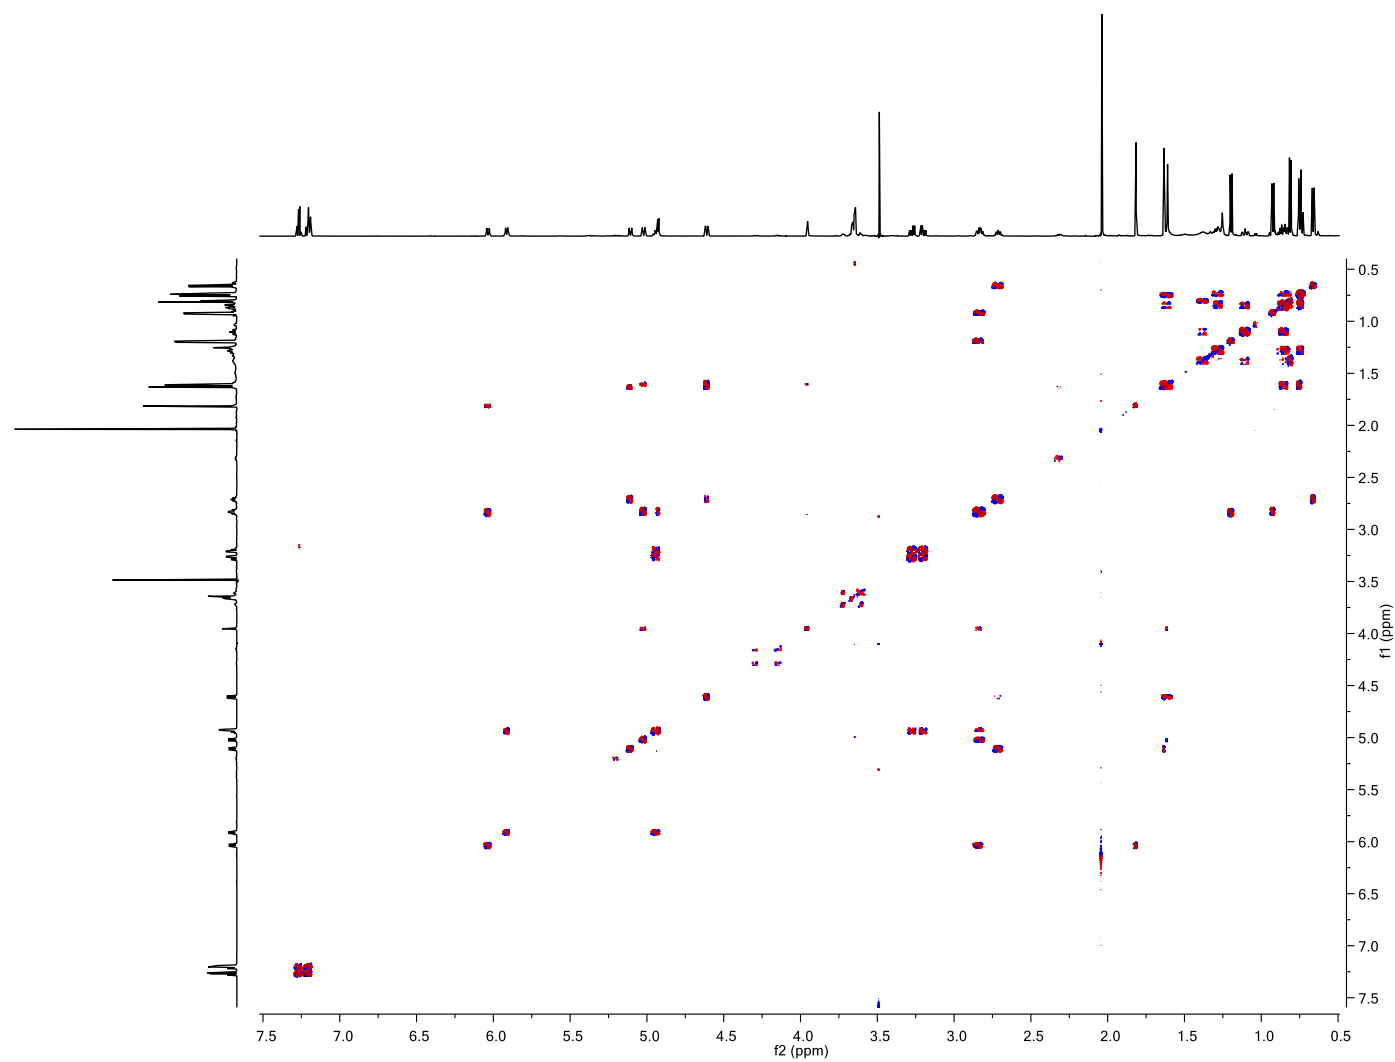

**Figure S12.** DQF-COSY of **1** (CDCl<sub>3</sub>, 600 MHz) detail showing crosspeaks for three similar structural units. Clusters of analogous crosspeaks correspond to couplings as indicated. Color coded envelopes identify crosspeaks from same unit.

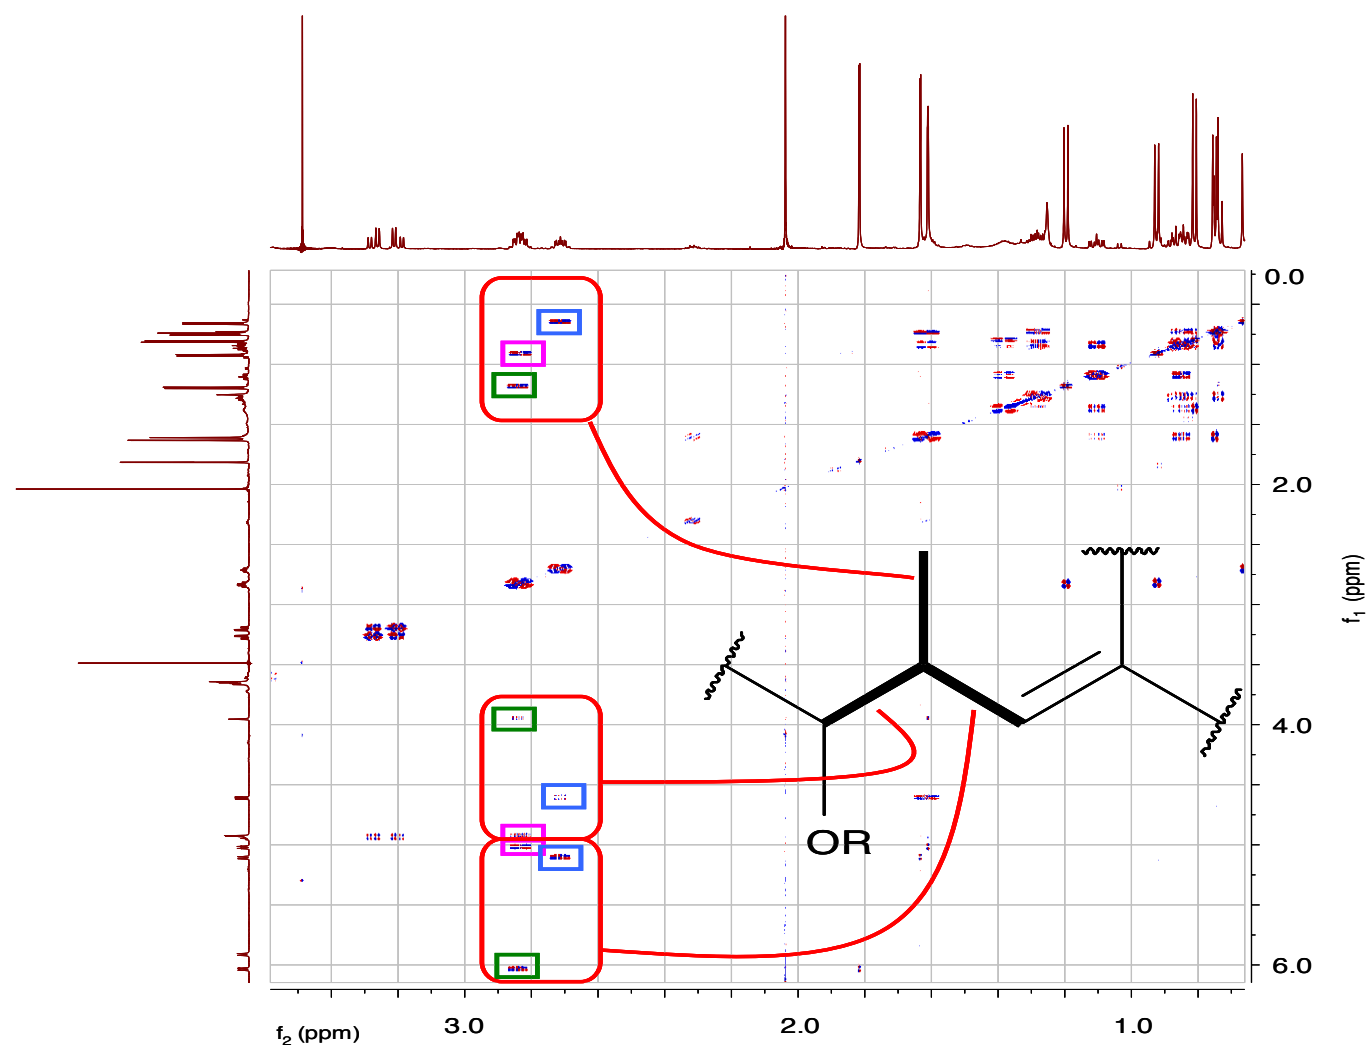

**Figure S13.** HSQC of **1** (CDCl<sub>3</sub>, 600 MHz).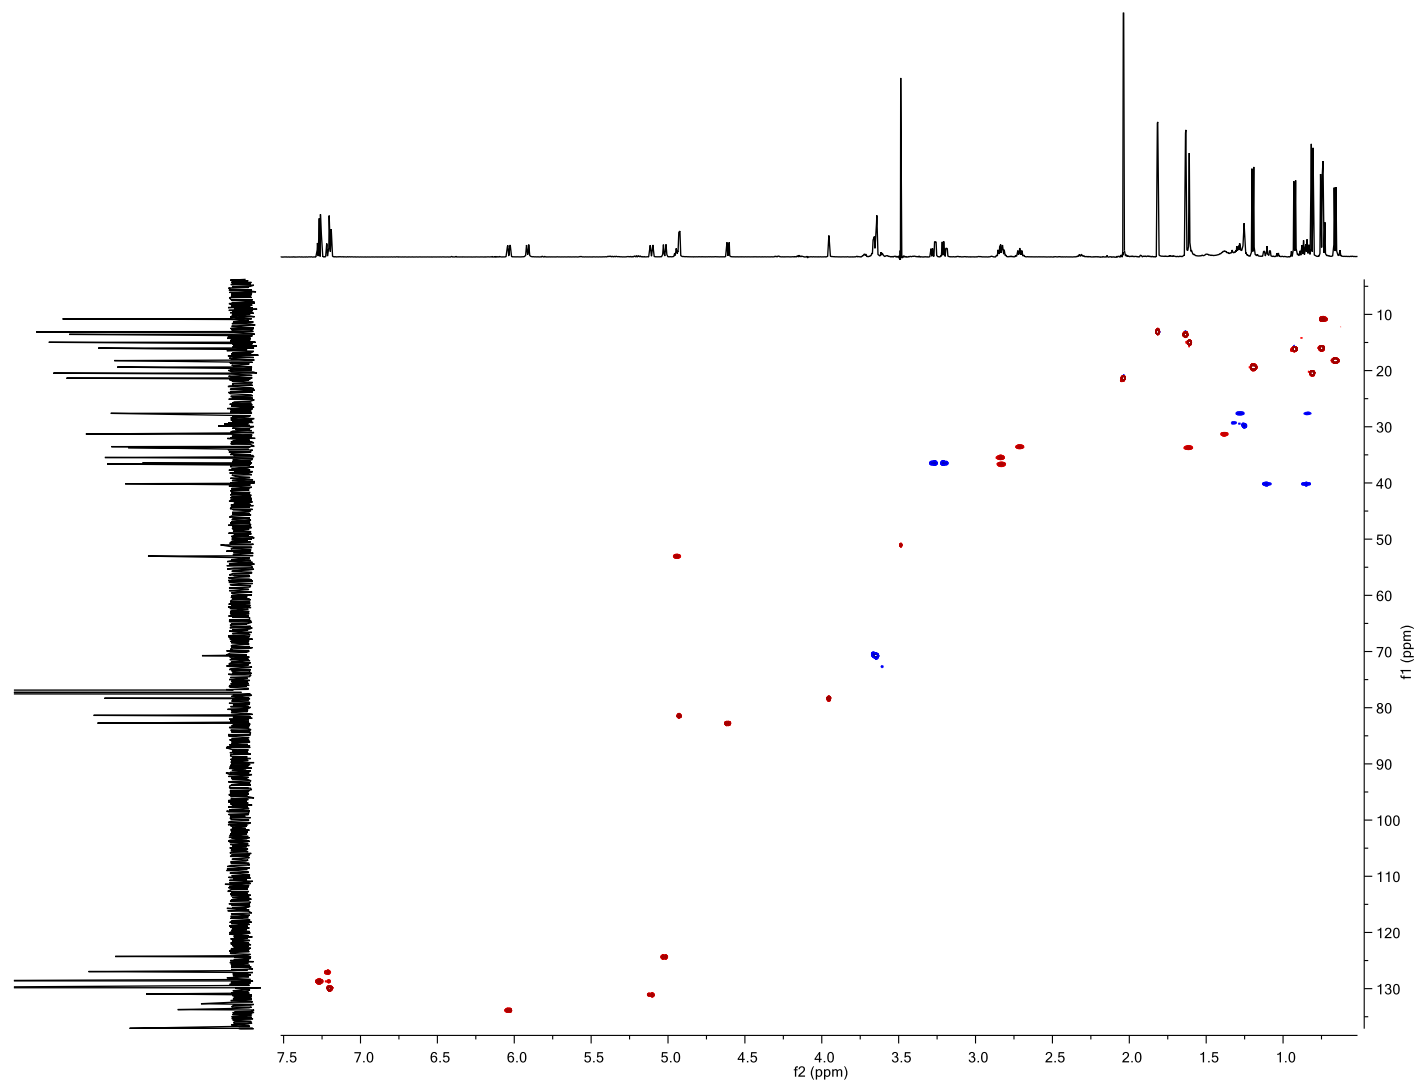

**Figure S14.** HSQC of **1** (CDCl<sub>3</sub>, 600 MHz) detail showing crosspeaks for alkenyl, oxymethine, methine, and methyl carbons in three similar structural units color coded as in Figure S12. Bolded bonds in structure indicate COSY network.

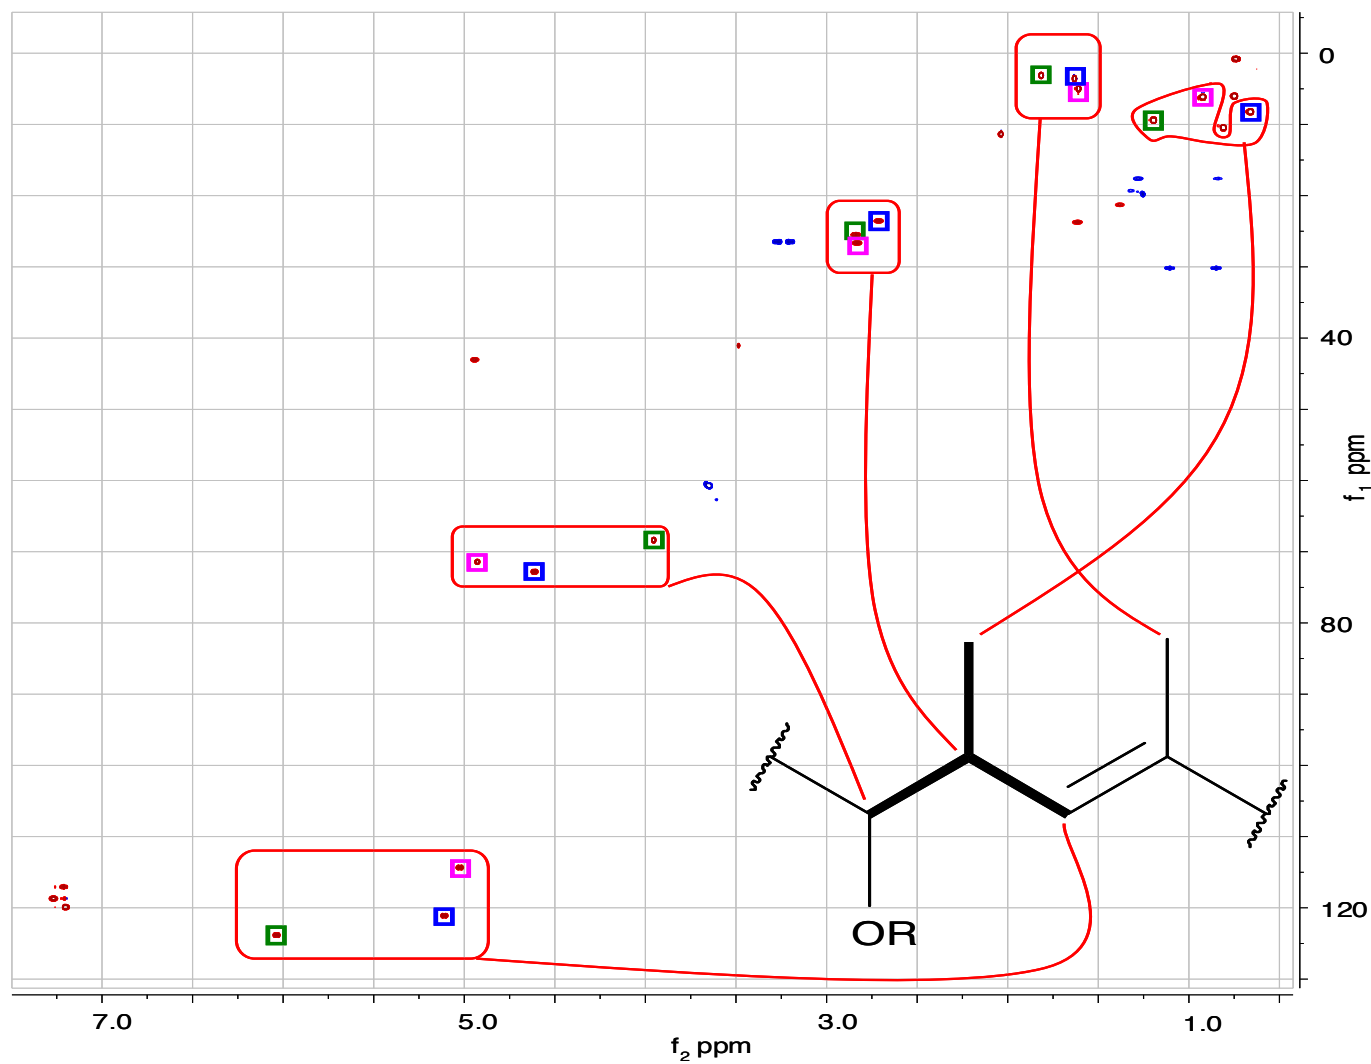



**Figure S15.** HMBC of **1** (CDCl<sub>3</sub>, 600 MHz).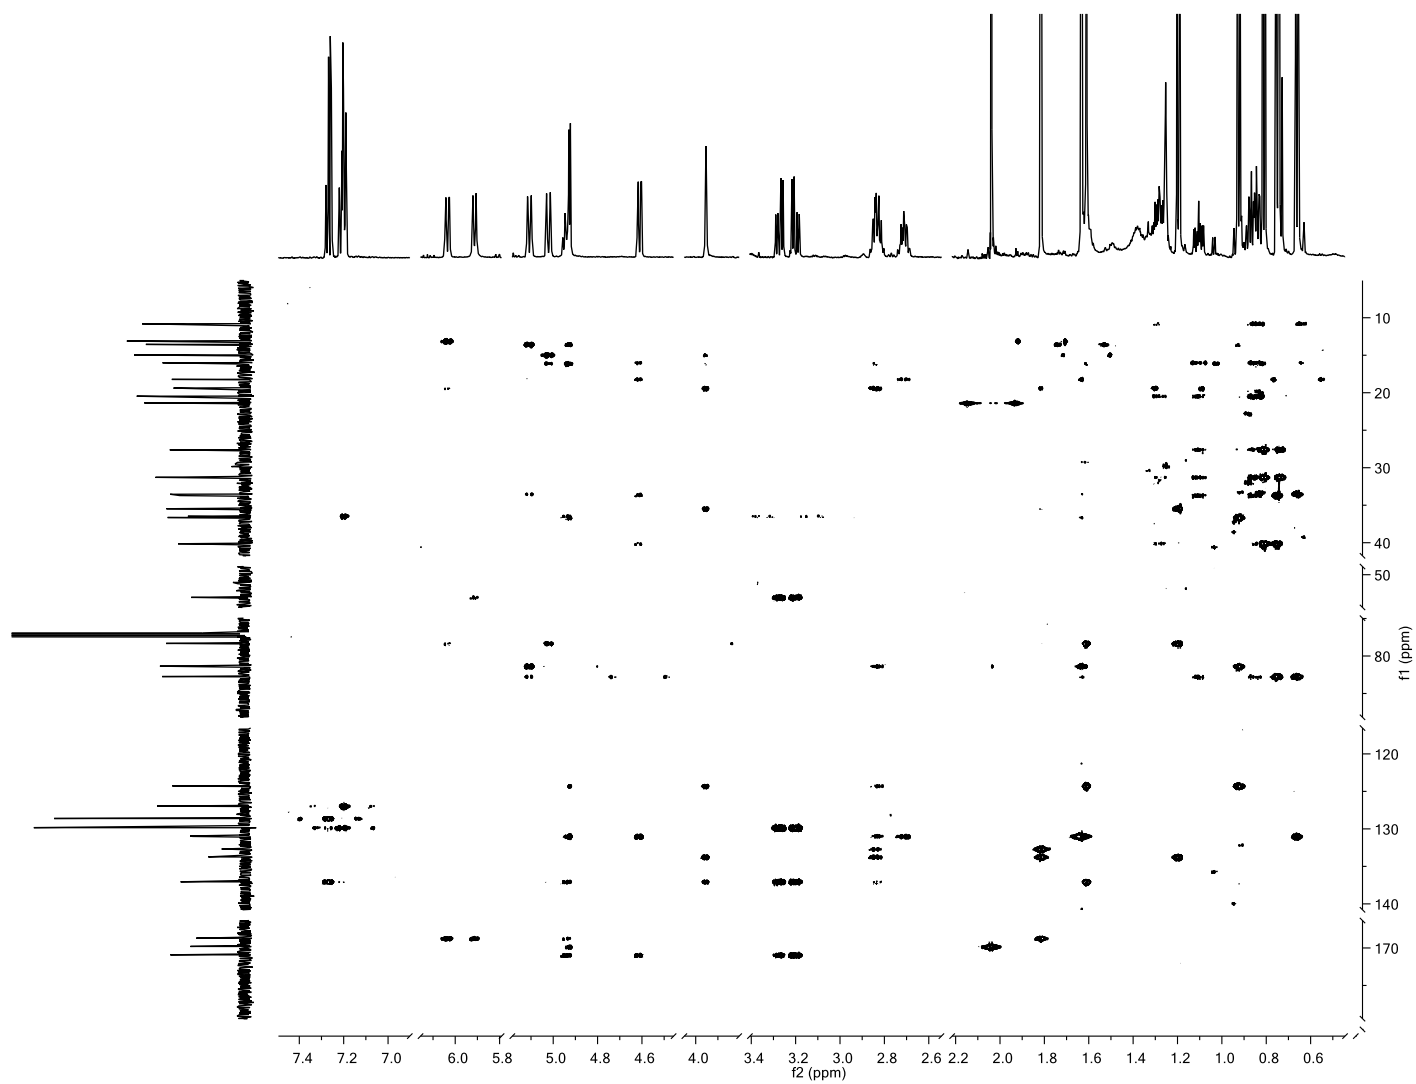

**Figure S16.** HMBC (CDCl<sub>3</sub>, 600 MHz) of **1** showing 5-bond correlations.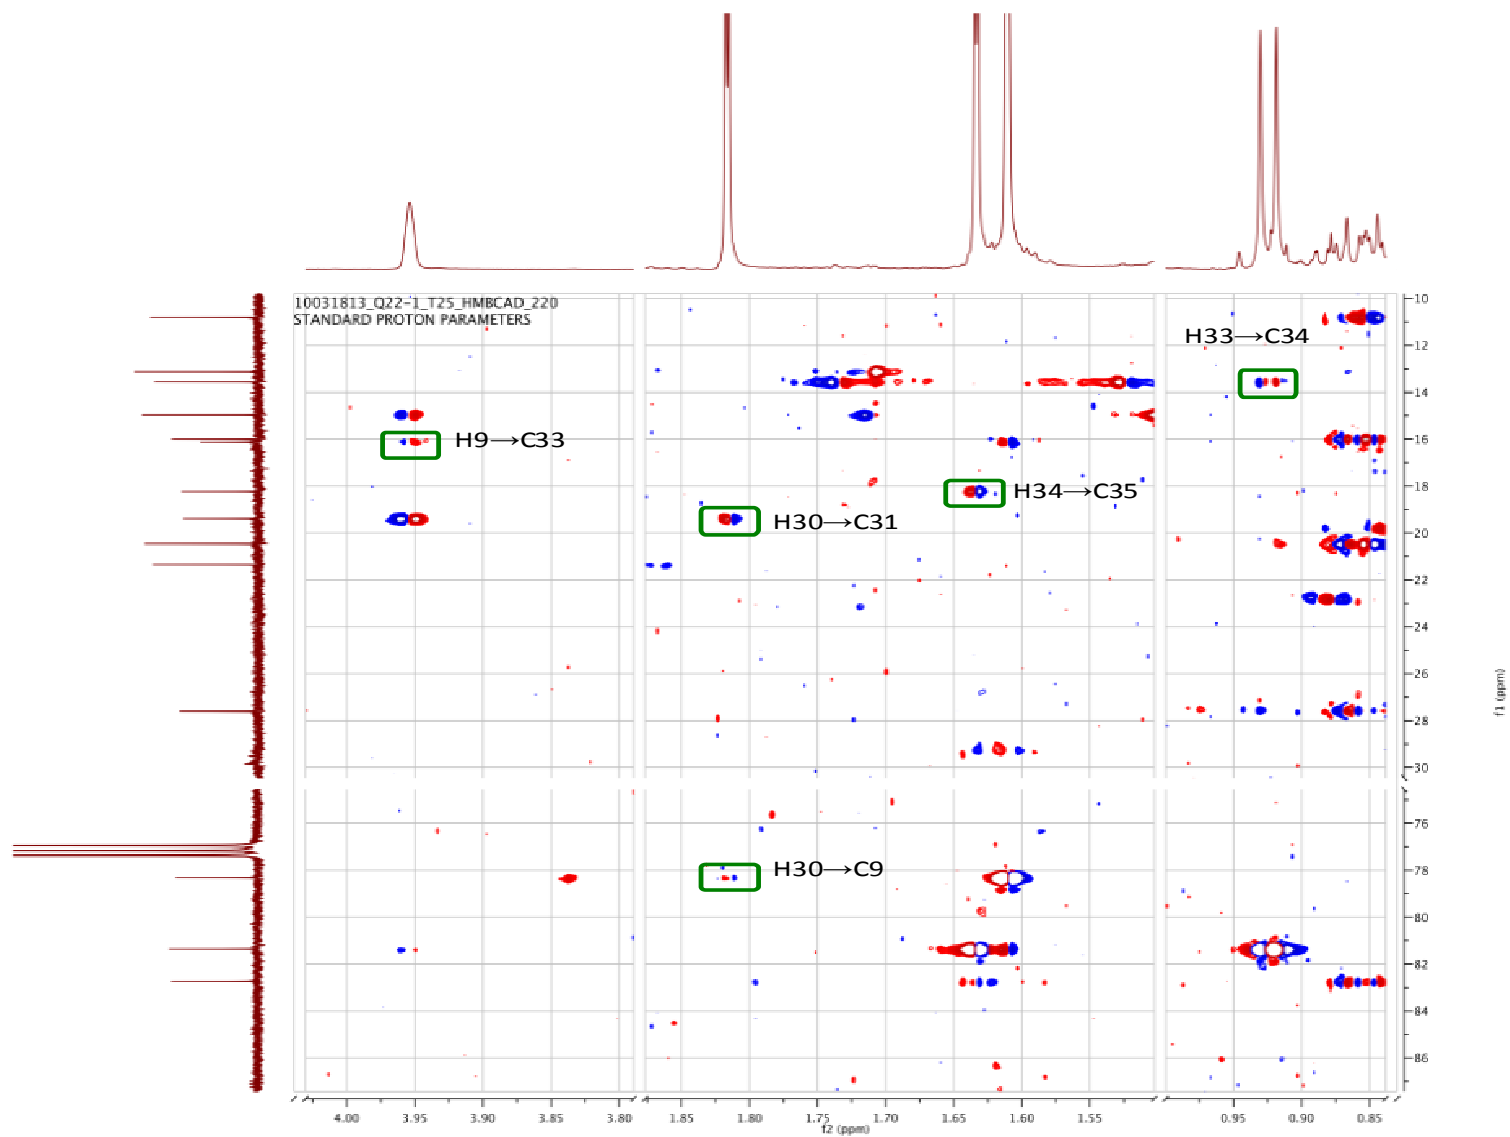

**Figure S17.** ROESY of **1** (CDCl<sub>3</sub>, 600 MHz).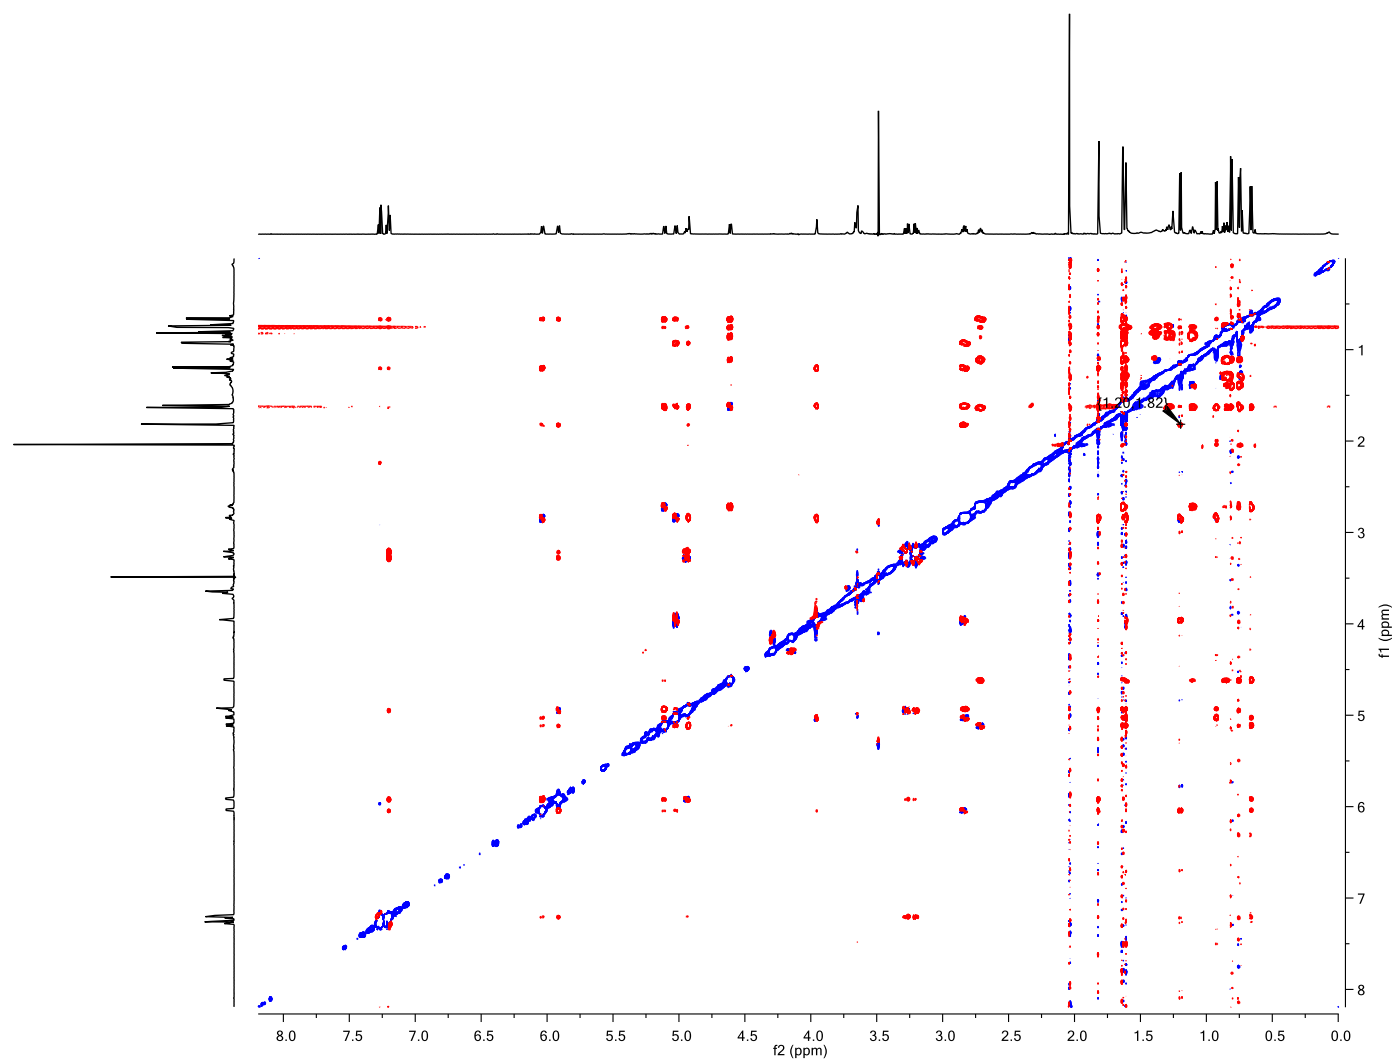

**Figure S18.**  $^1\text{H}$  NMR of Metacridamide B (**2**) ( $\text{CD}_3\text{OD}$ , 600 MHz).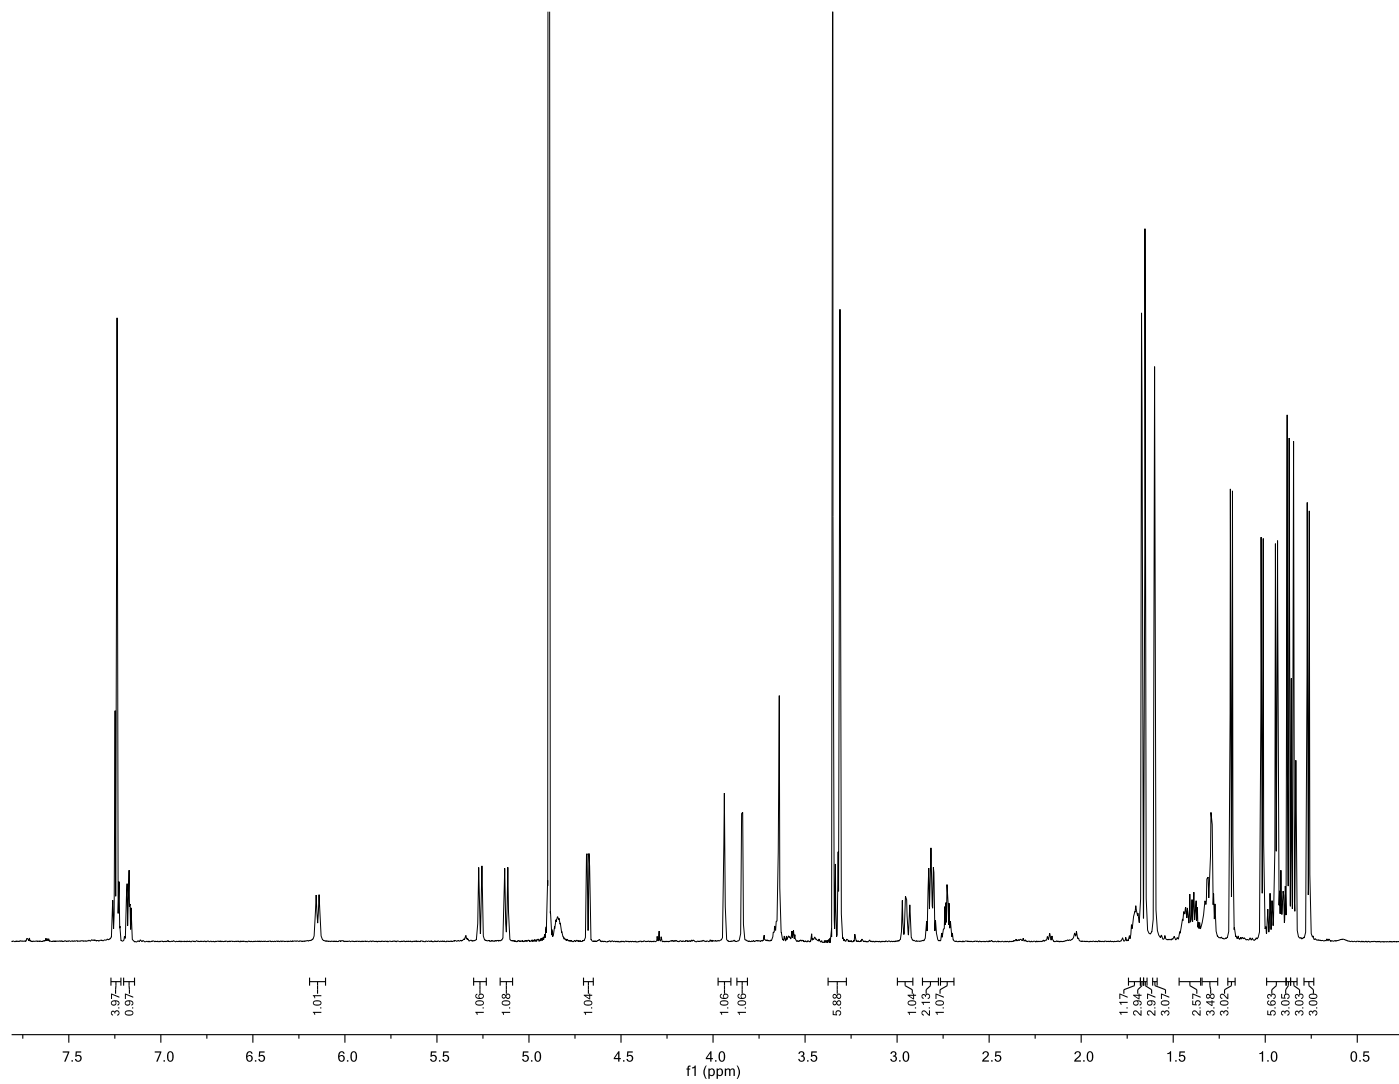

**Figure S19.**  $^1\text{H}$  NMR of **2** ( $\text{CD}_3\text{OD}$ , 600 MHz), expanded.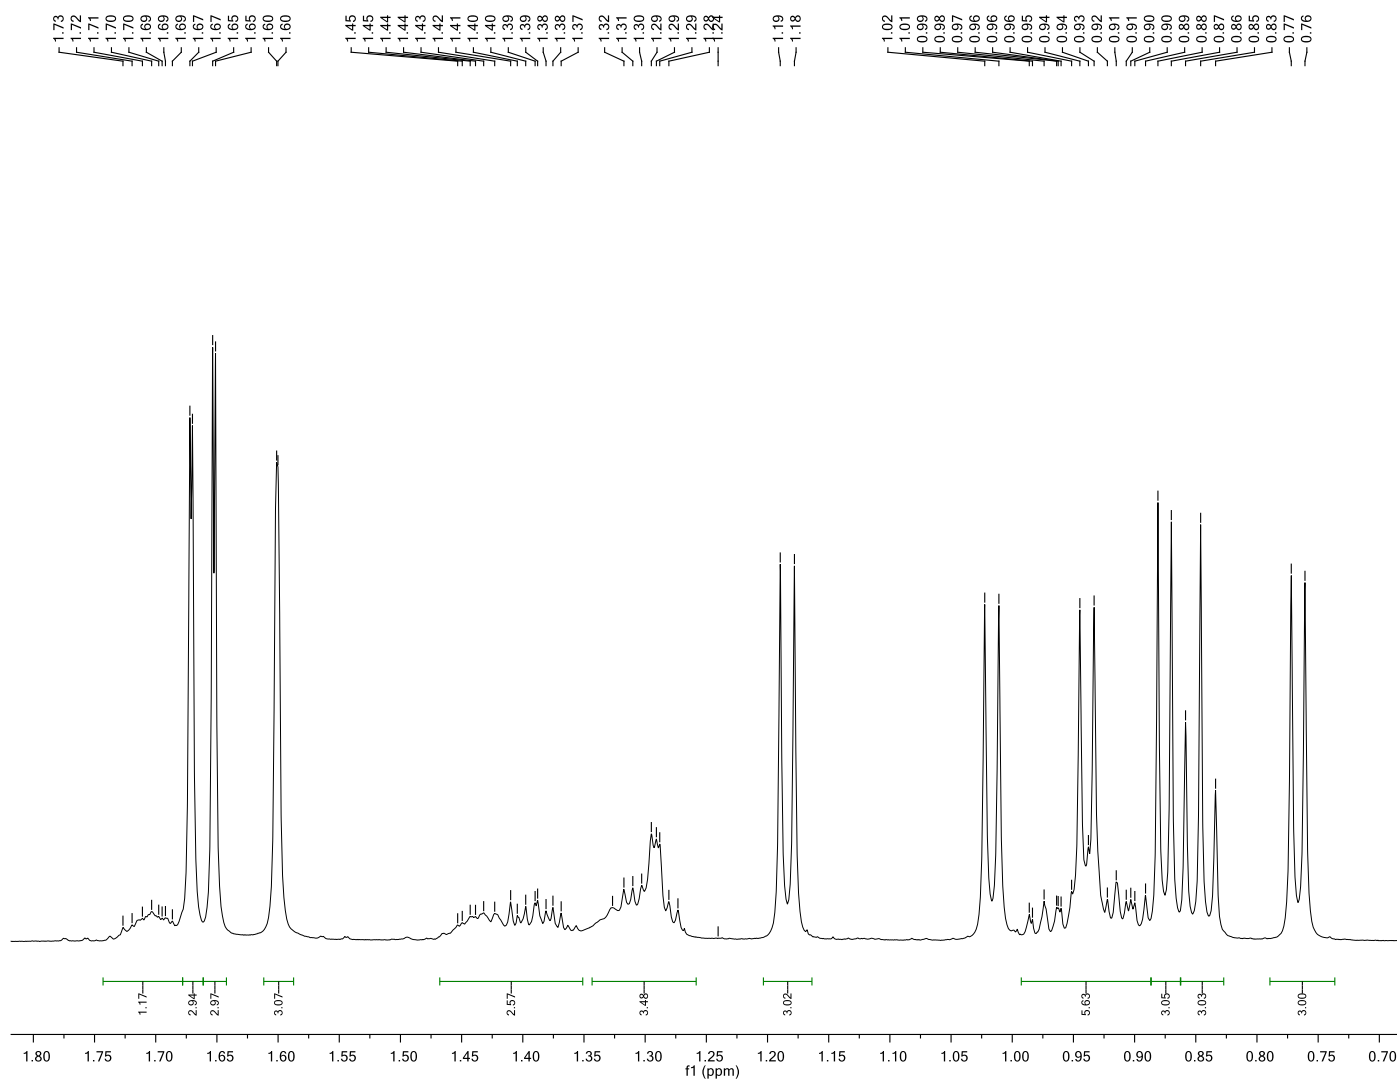

**Figure S20.**  $^1\text{H}$  NMR of **2** ( $\text{CD}_3\text{OD}$ , 600 MHz), expanded.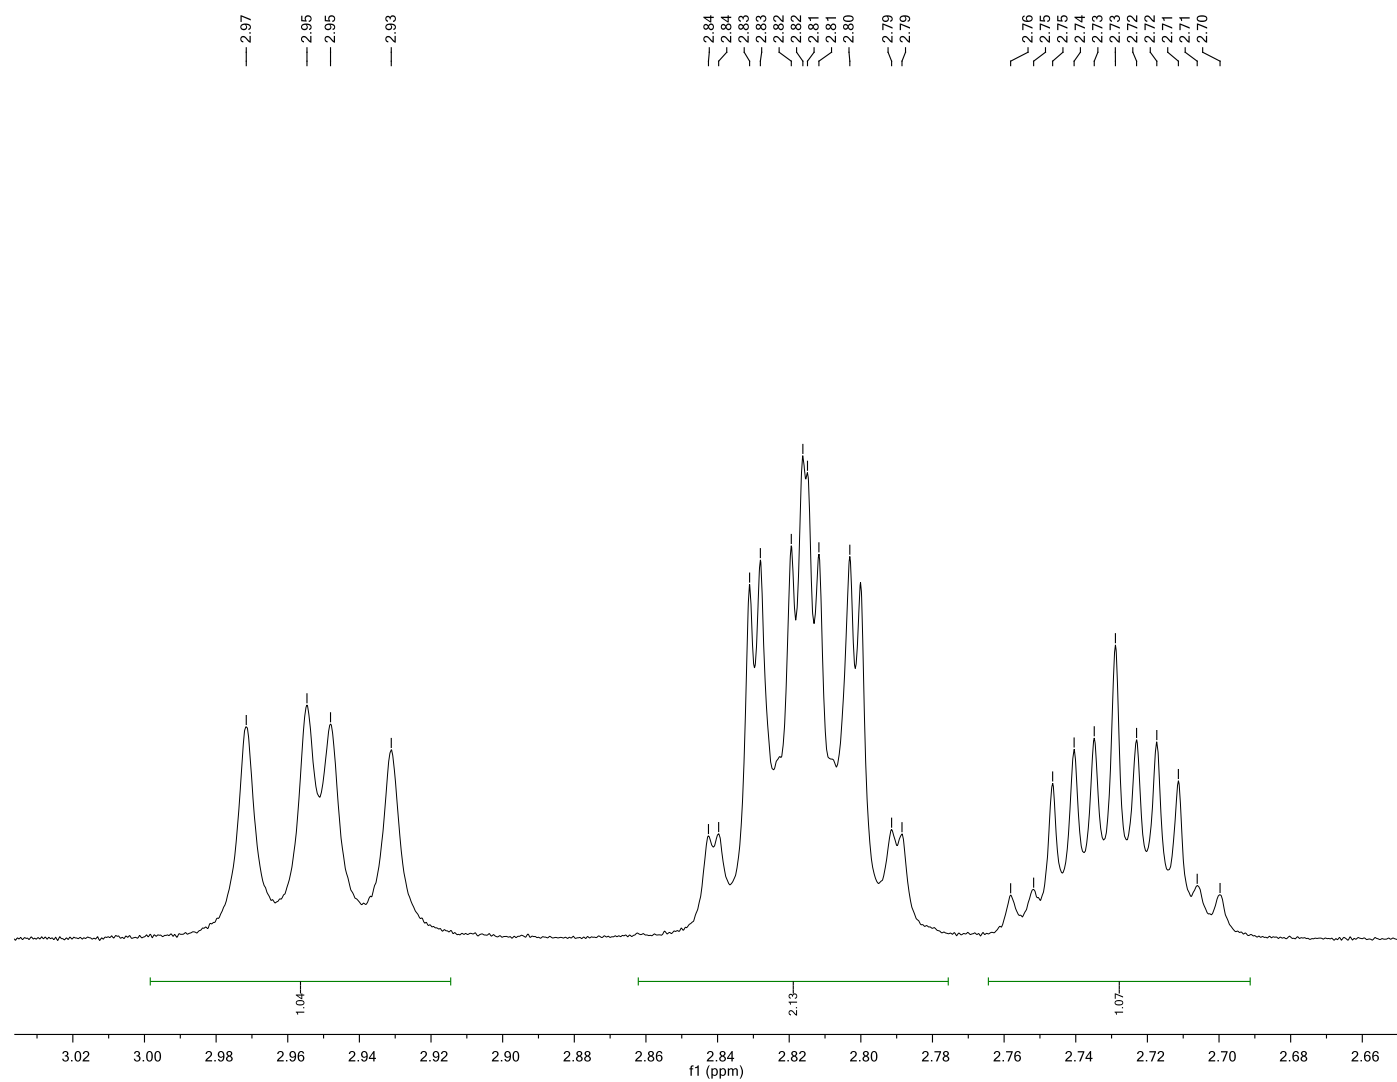

**Figure S21.**  $^1\text{H}$  NMR of **2** ( $\text{CD}_3\text{OD}$ , 600 MHz), expanded.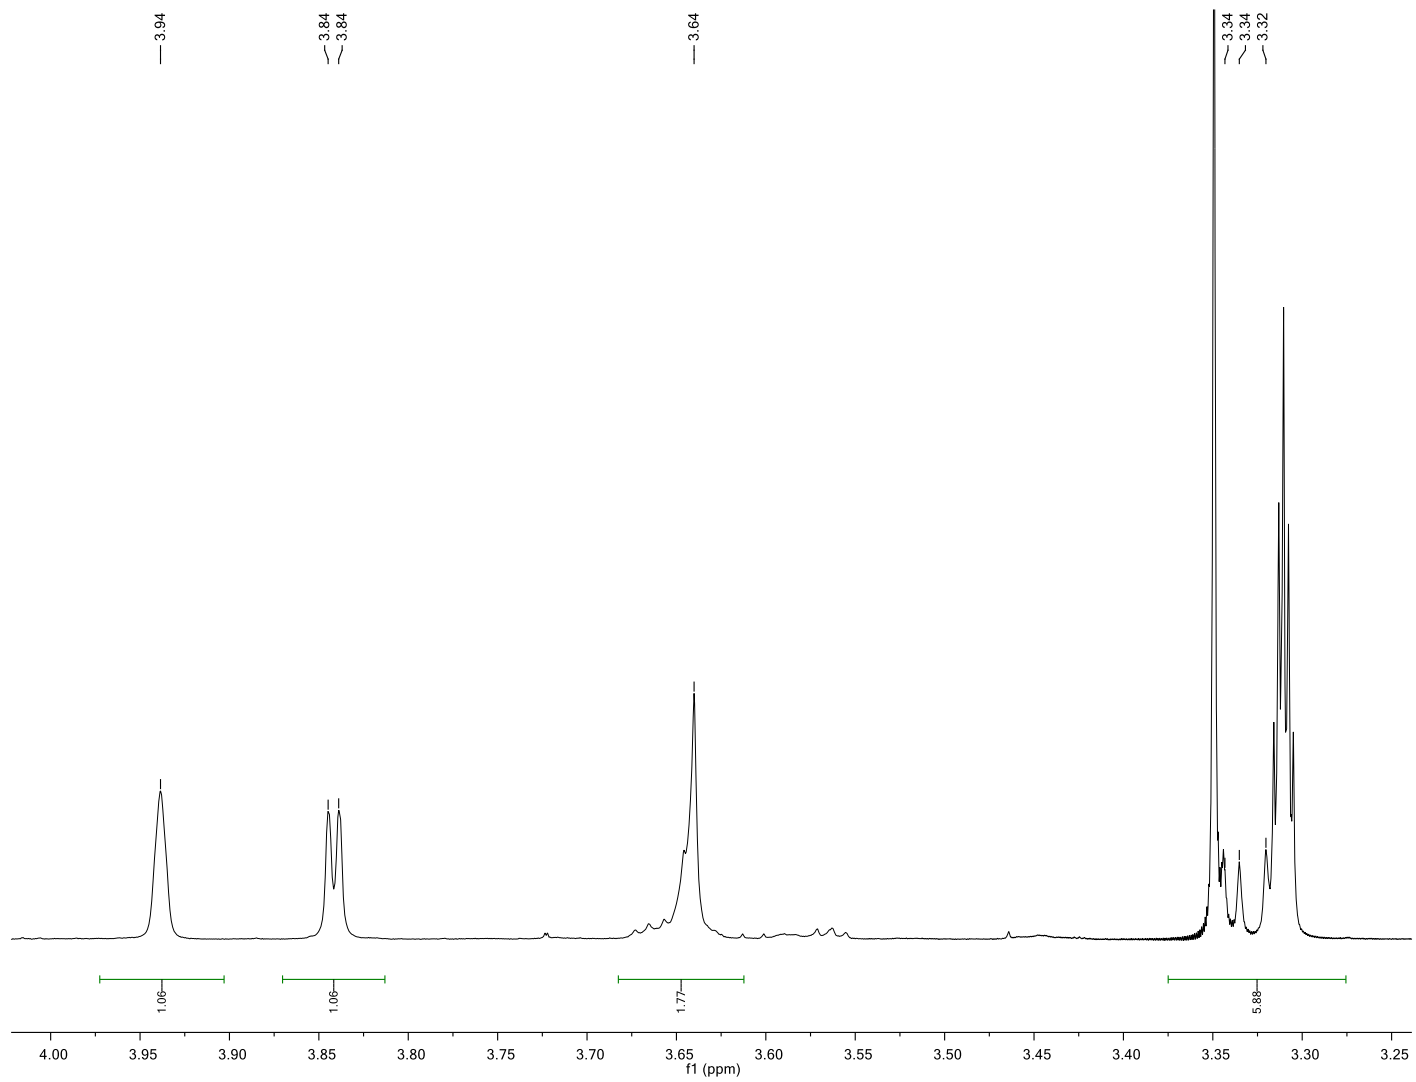

**Figure S22.**  $^1\text{H}$  NMR of **2** ( $\text{CD}_3\text{OD}$ , 600 MHz), expanded.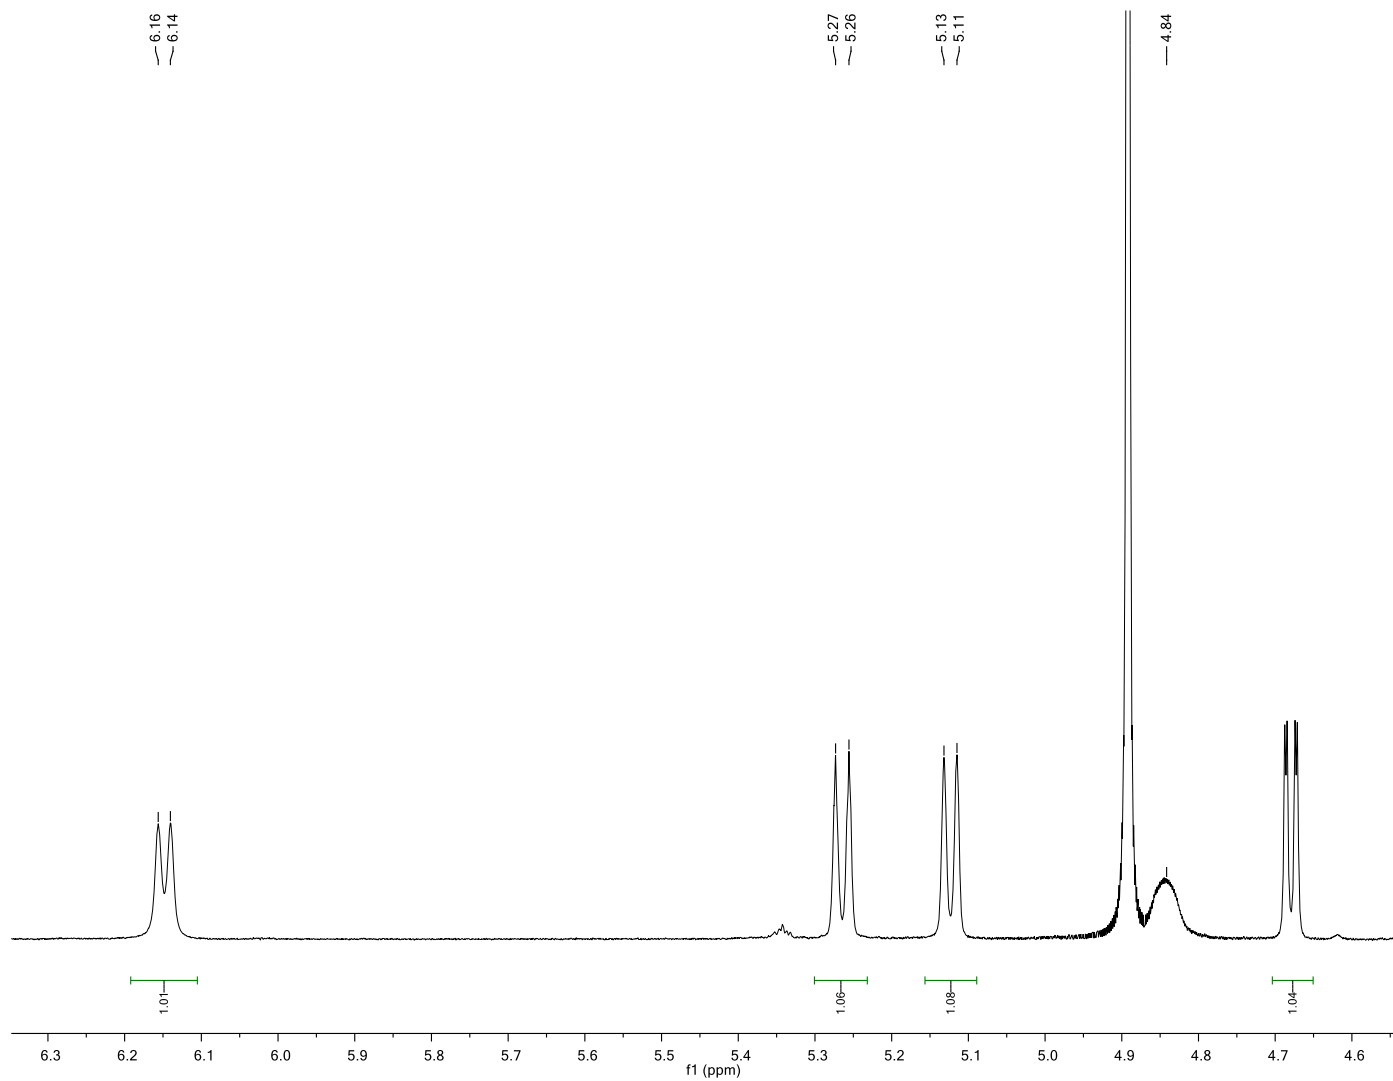



**Figure S23.**  $^1\text{H}$  NMR of **2** ( $\text{CD}_3\text{OD}$ , 600 MHz), expanded.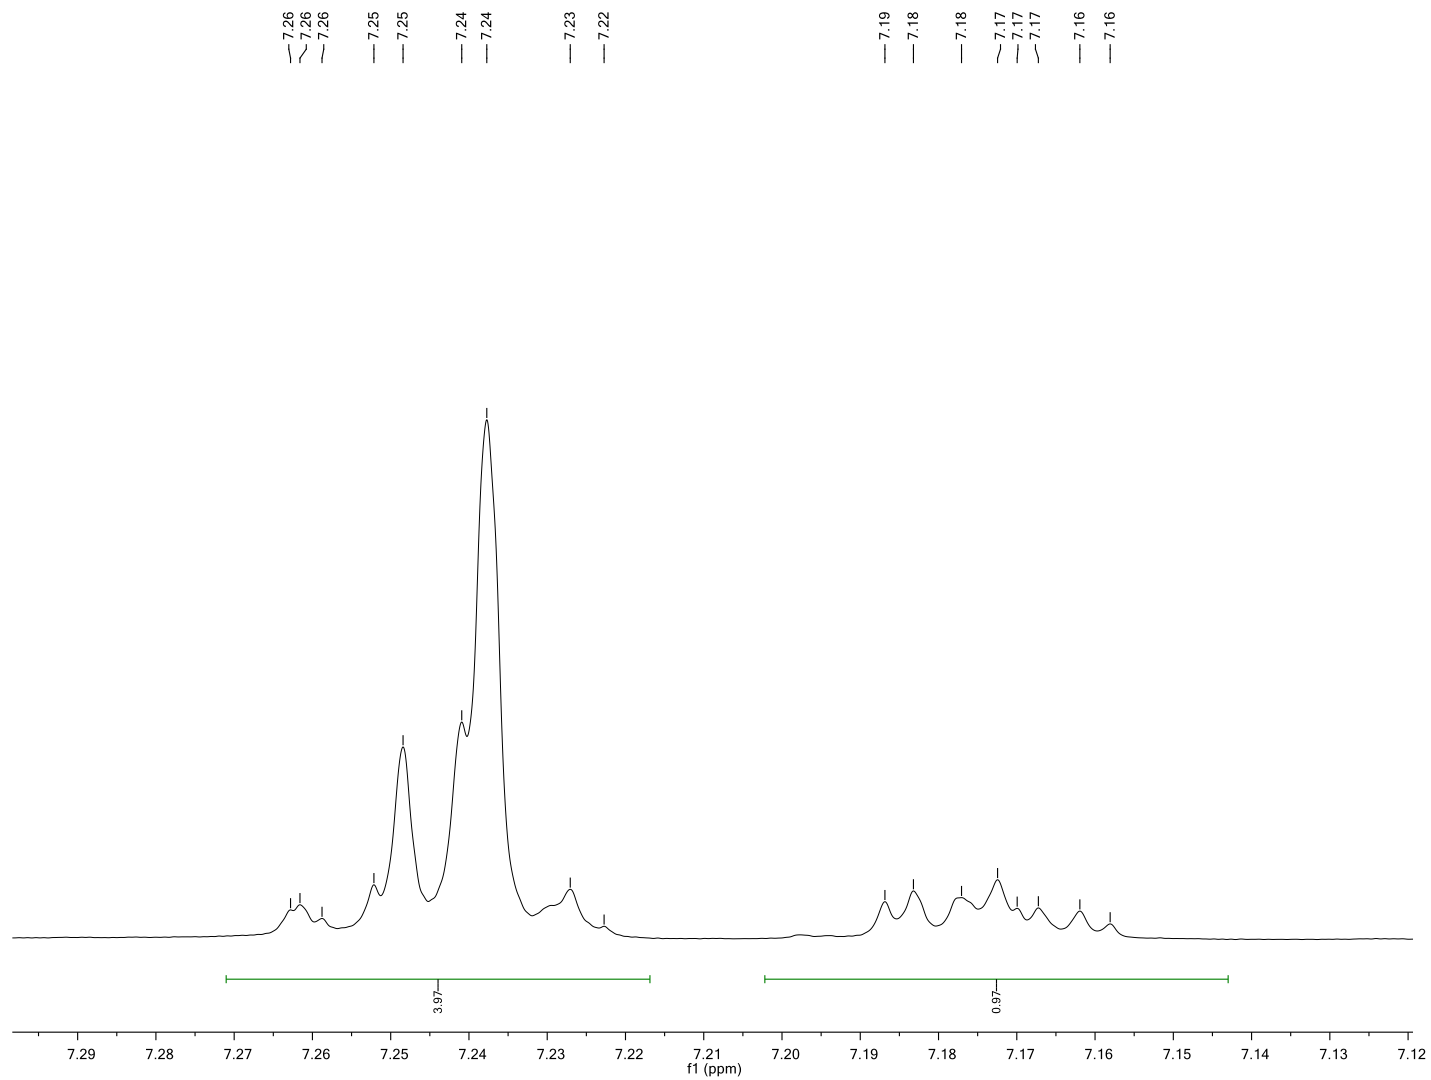

**Figure S24.**  $^{13}\text{C}$  NMR of **2** ( $\text{CD}_3\text{OD}$ , 125 MHz).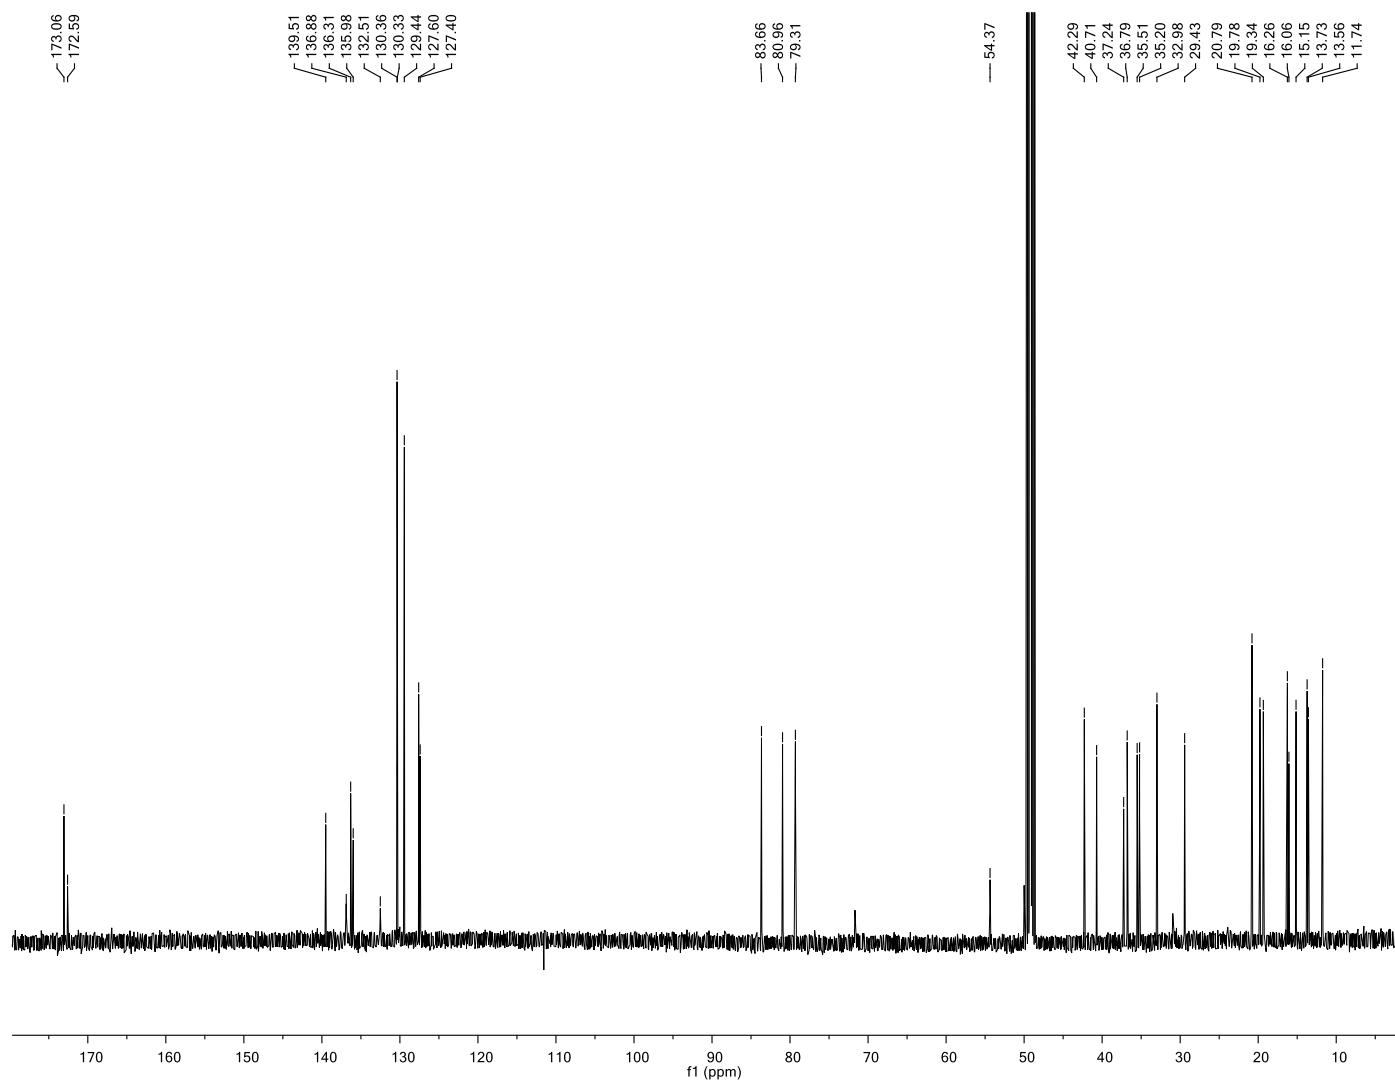

**Figure S25.**  $^{13}\text{C}$  NMR of **2** ( $\text{CD}_3\text{OD}$ , 125 MHz), expanded.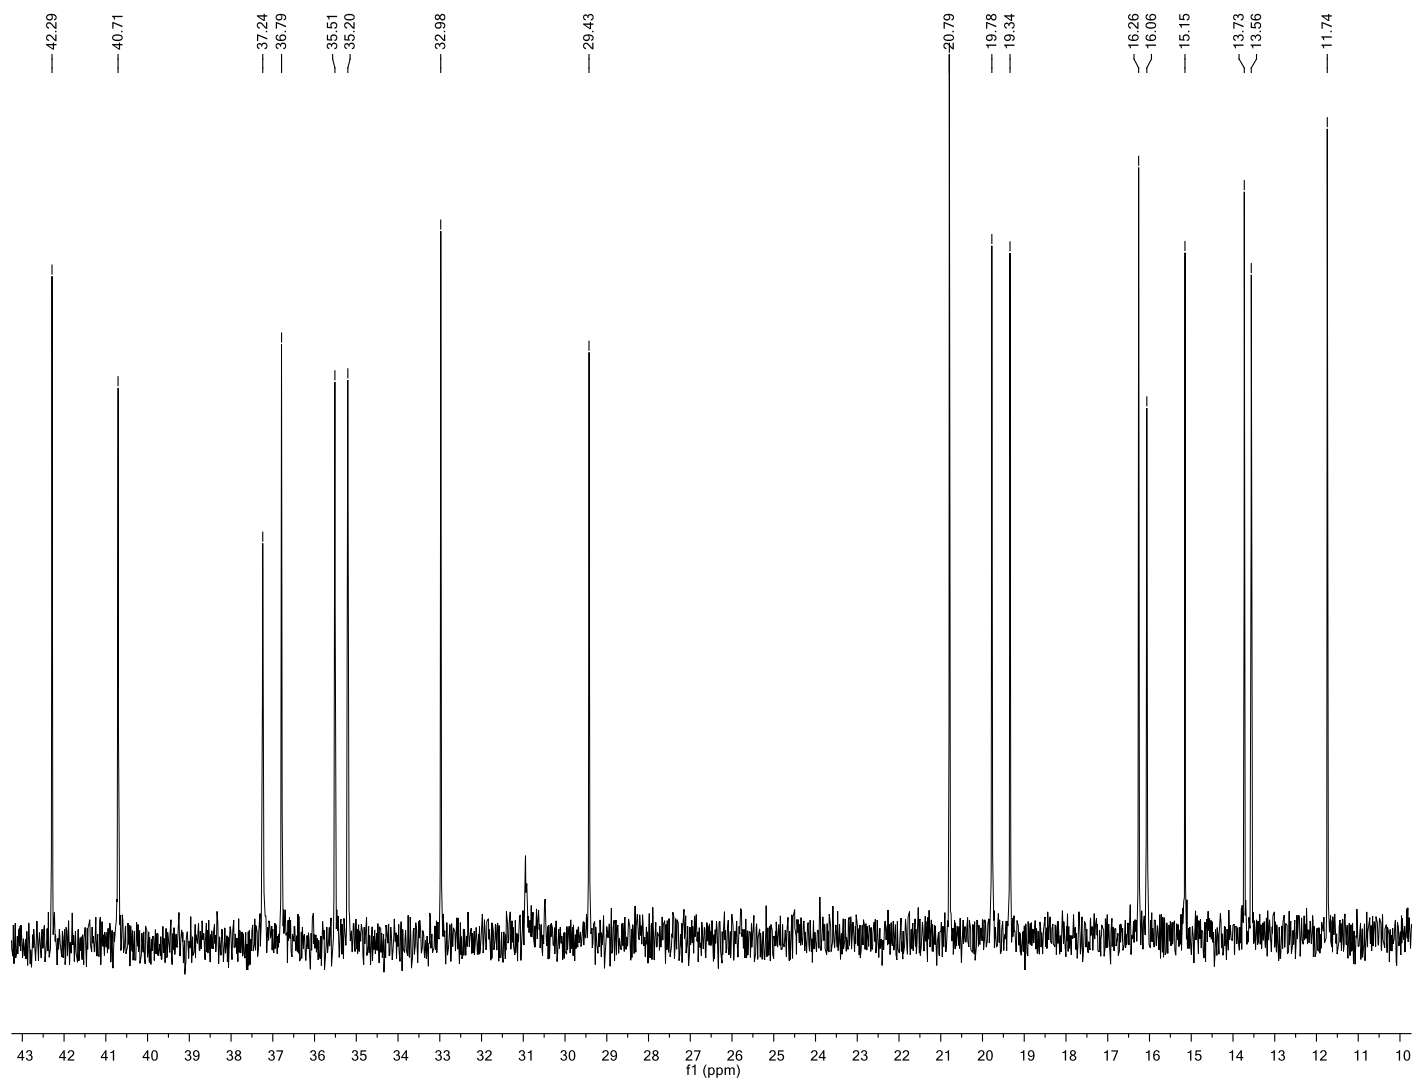

**Figure S26.**  $^{13}\text{C}$  NMR of **2** ( $\text{CD}_3\text{OD}$ , 125 MHz), expanded.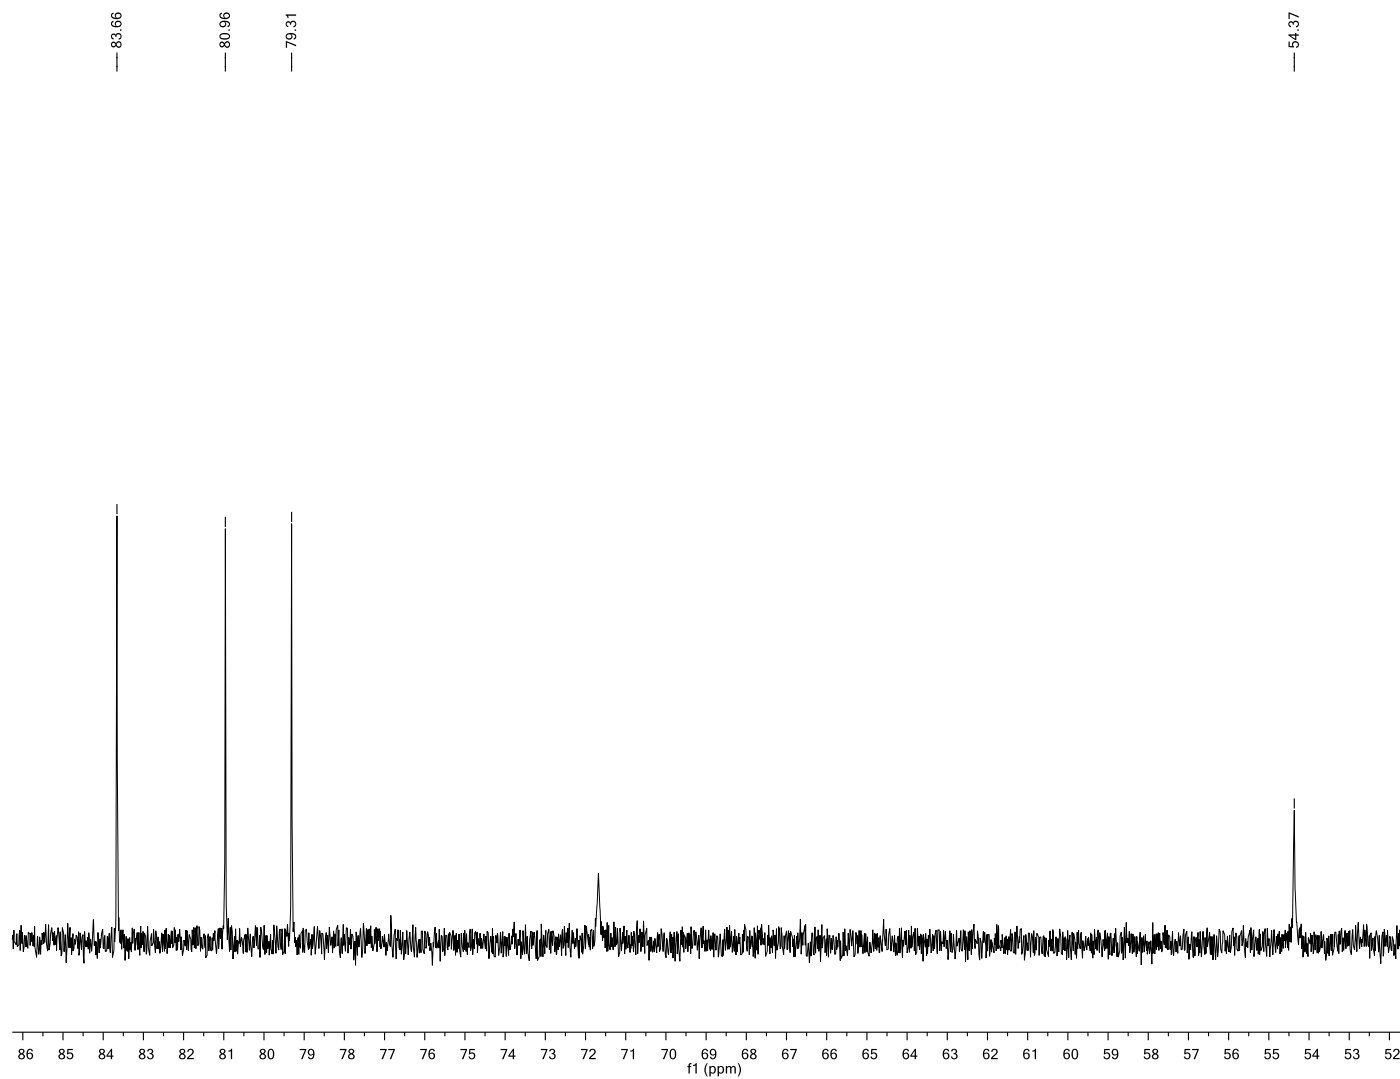

**Figure S27.**  $^{13}\text{C}$  NMR of **2** ( $\text{CD}_3\text{OD}$ , 125 MHz), expanded.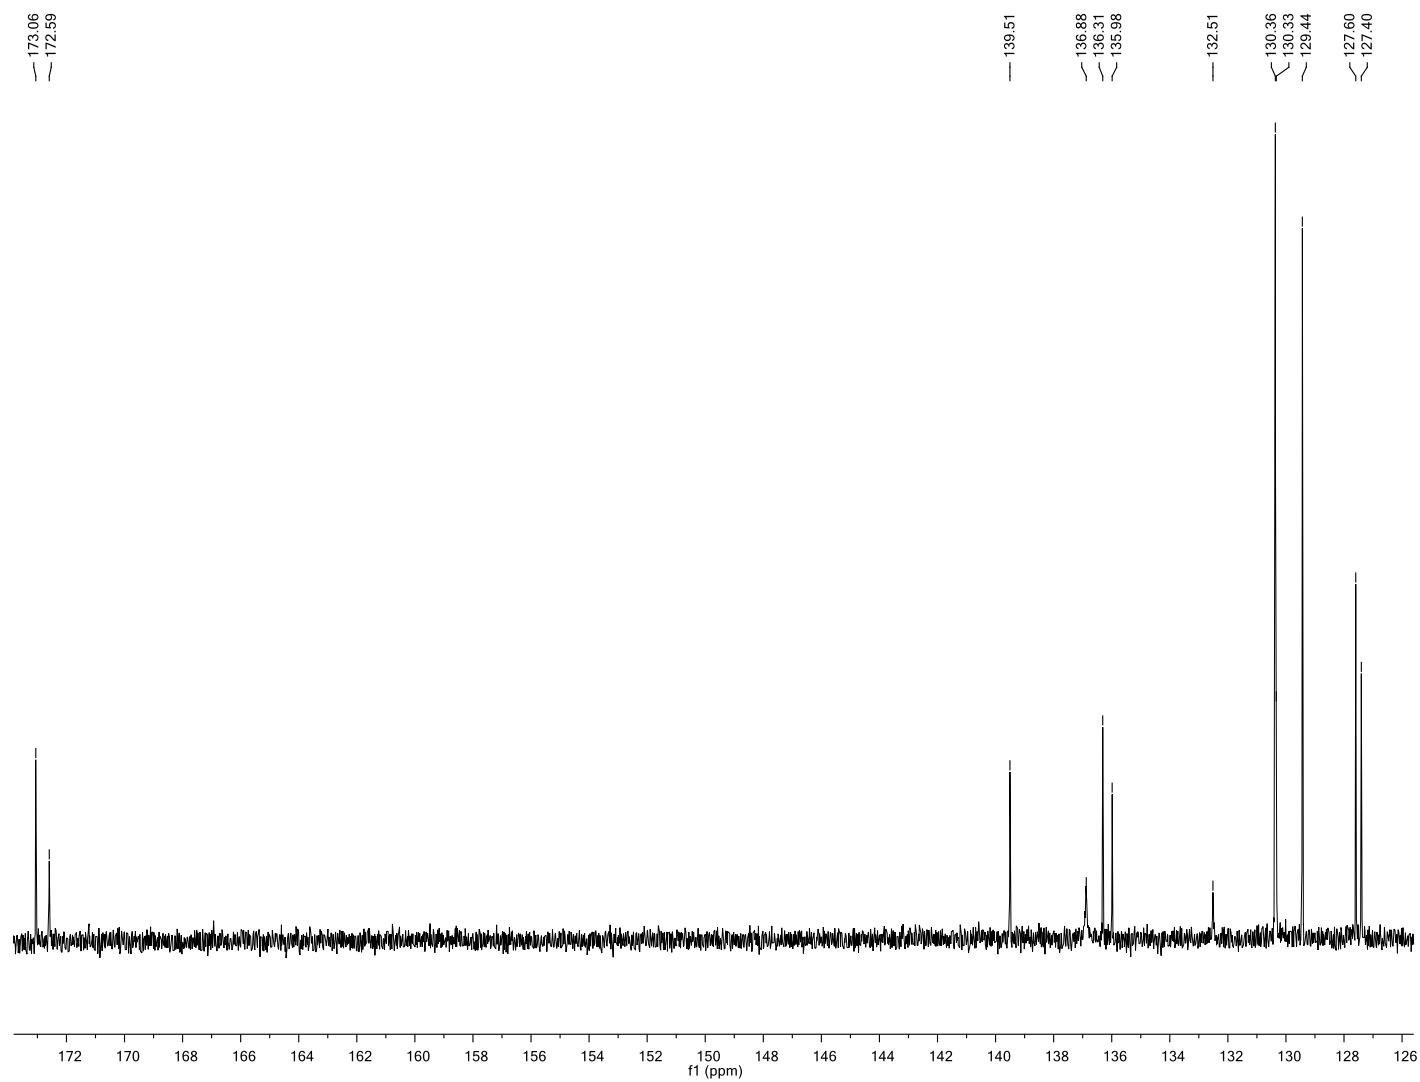

**Figure S28.** COSY of **2** (CD<sub>3</sub>OD, 600 MHz).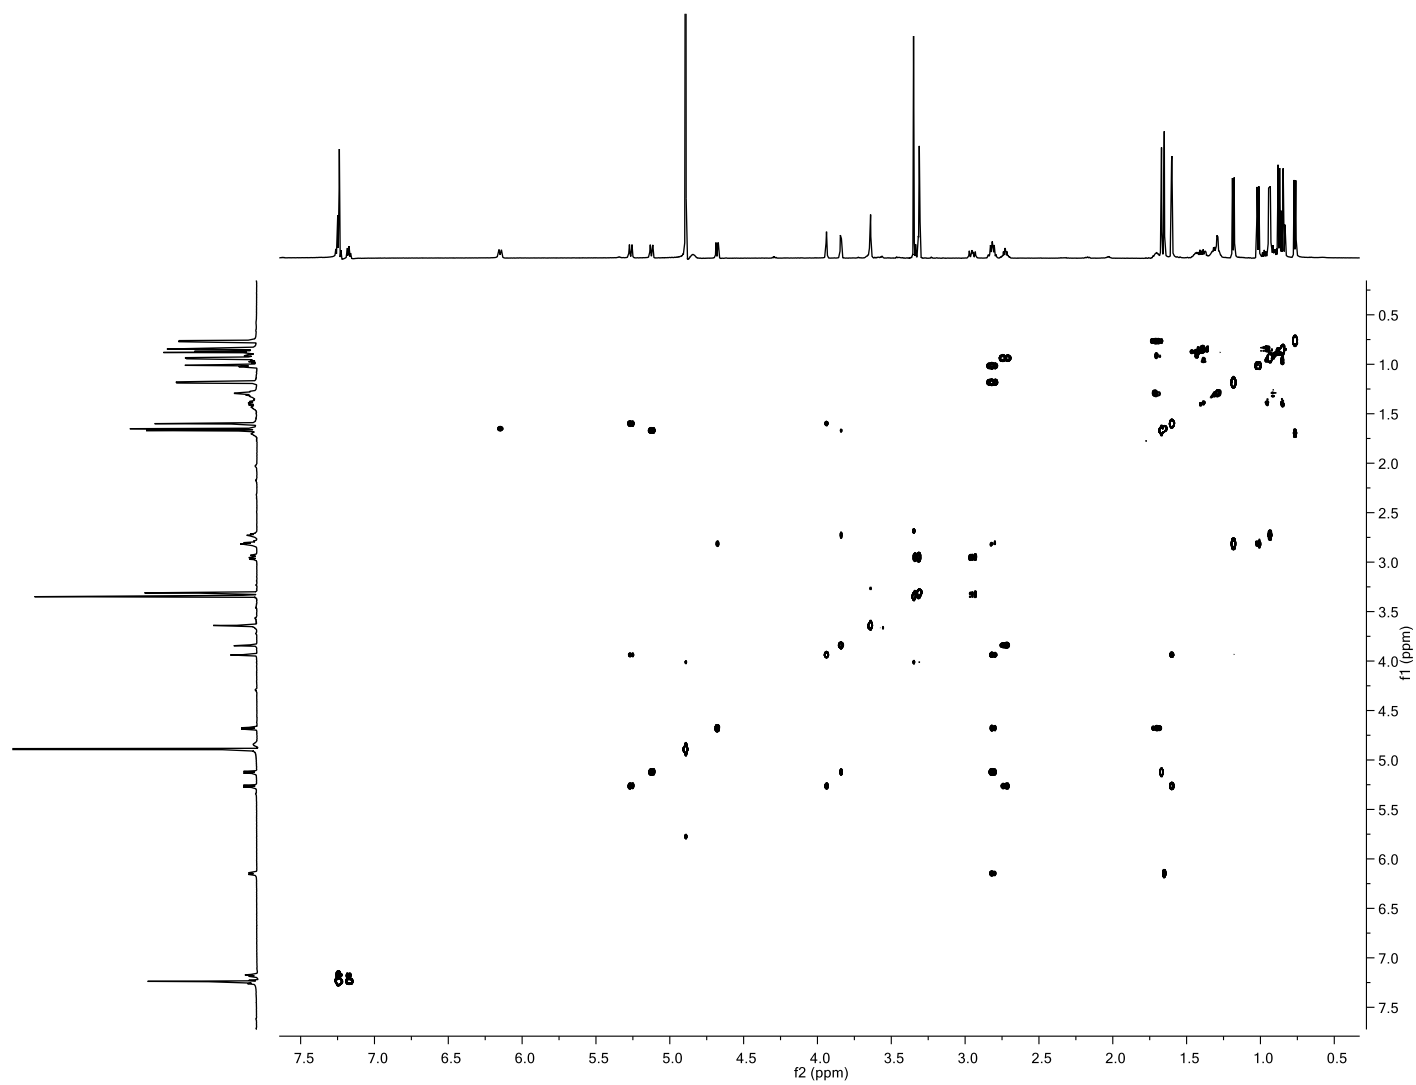

**Figure S29.** COSY of **2** (CD<sub>3</sub>OH, 600 MHz) detail showing amide proton correlations.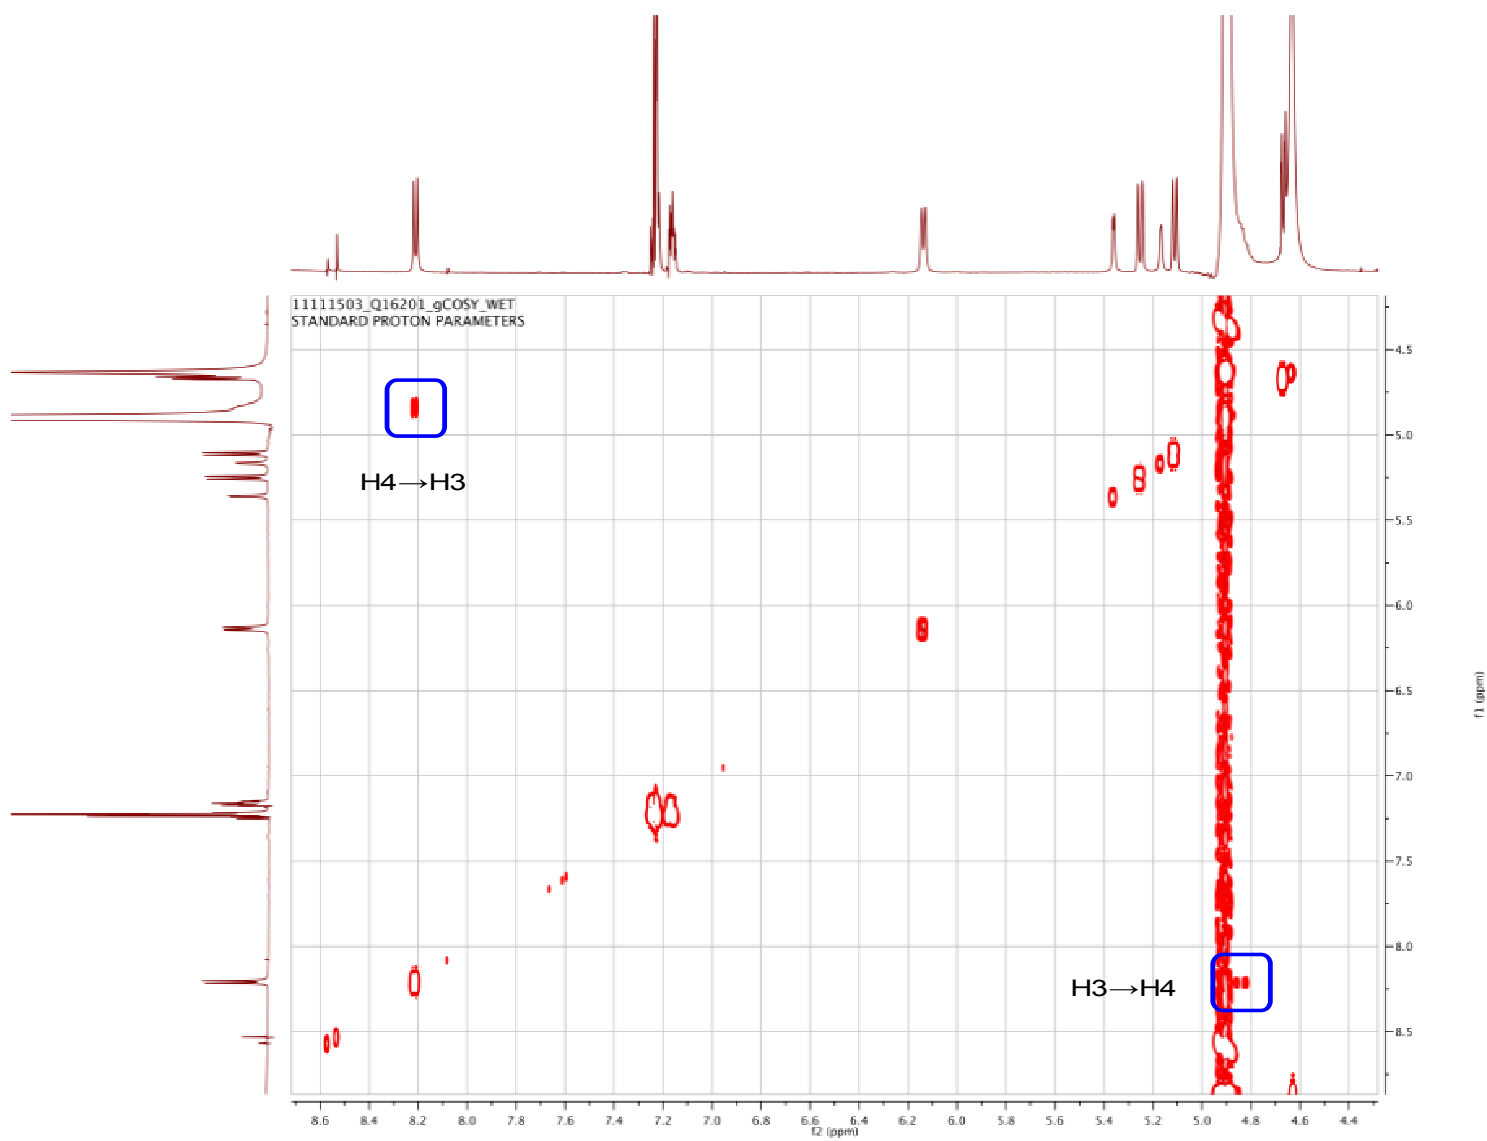

**Figure S30.** HSQC of **2** (CD<sub>3</sub>OD, 600 MHz).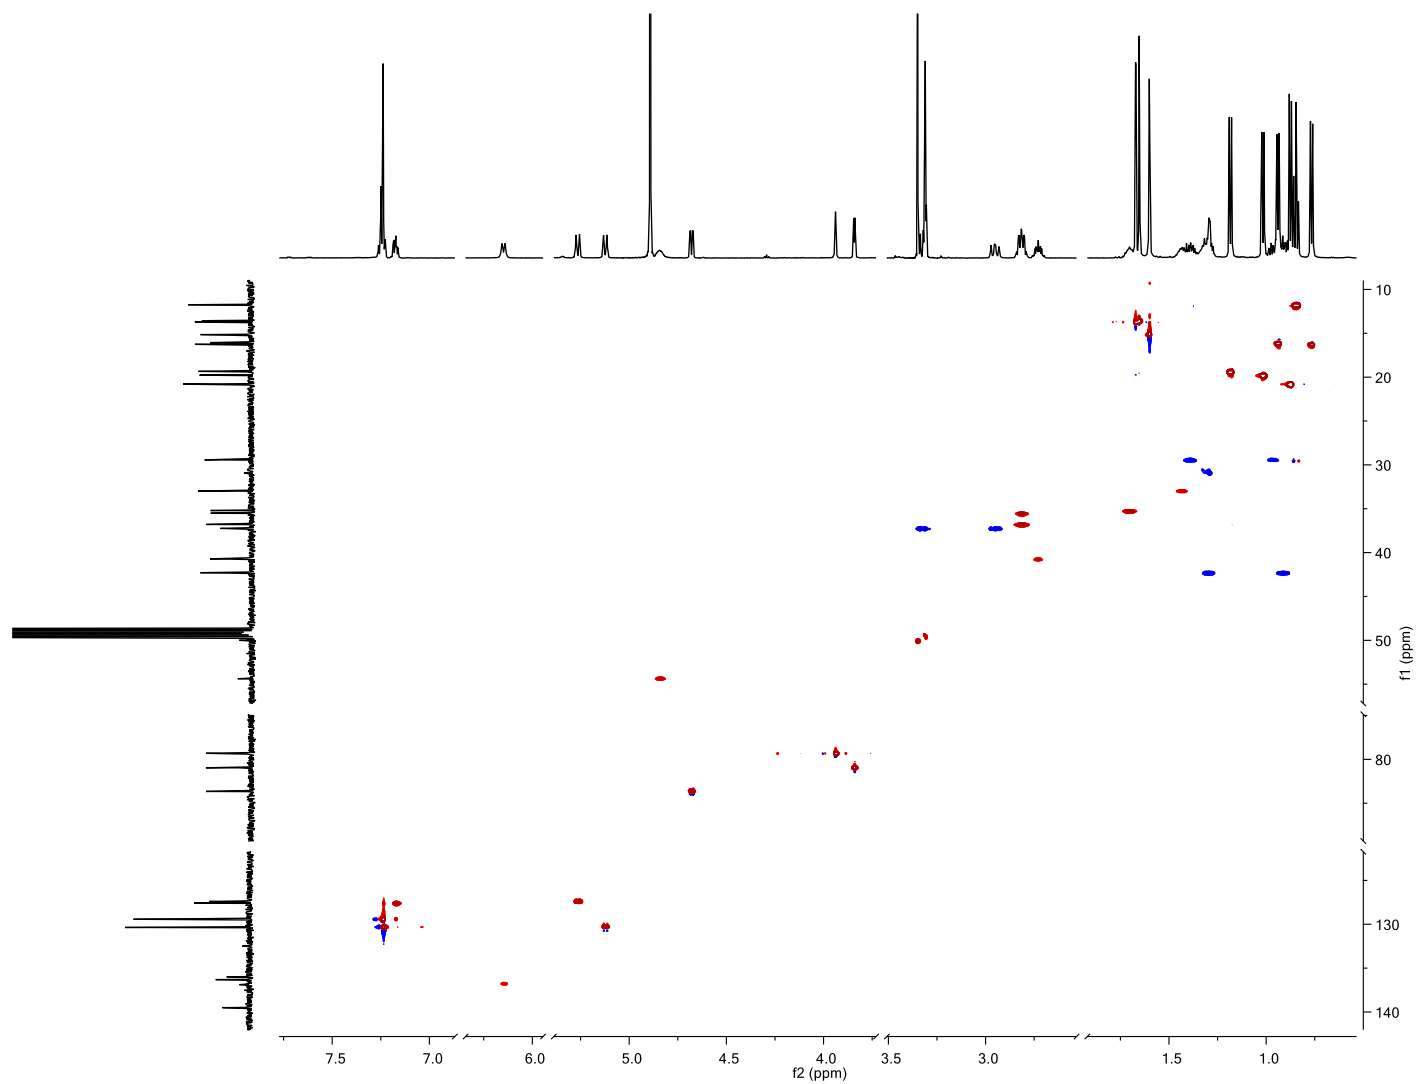



**Figure S31.** HMBC of **2** (CD<sub>3</sub>OD, 600 MHz).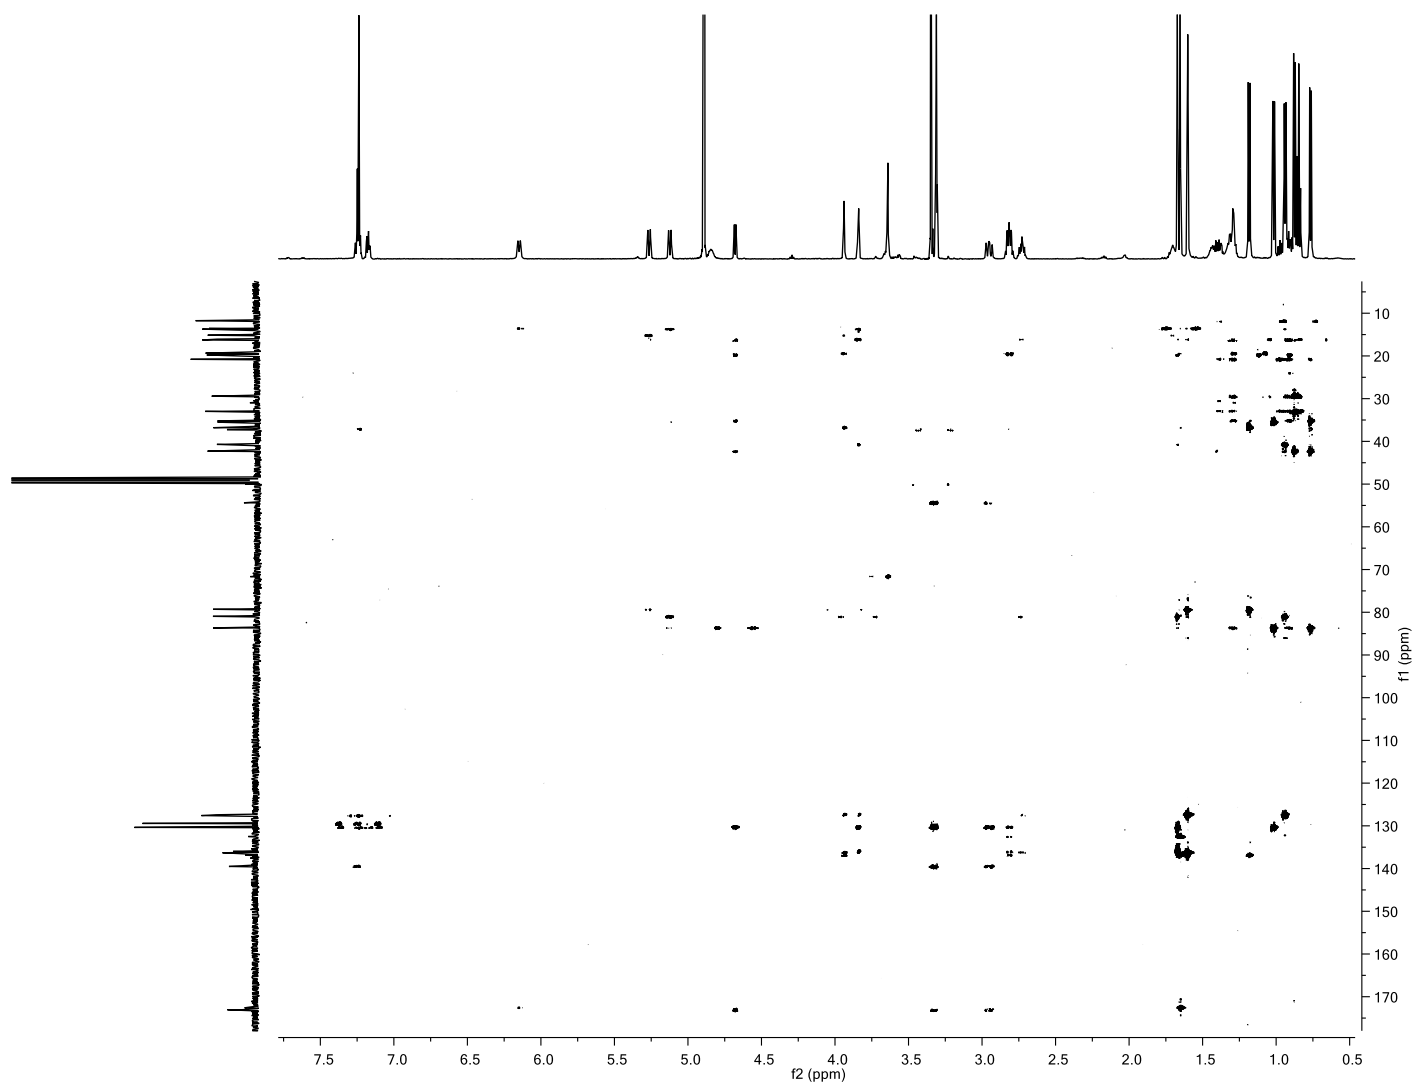

**Figure S32** HMBC of **2** (CD<sub>3</sub>OD, 600 MHz) detail showing 5-bond correlations.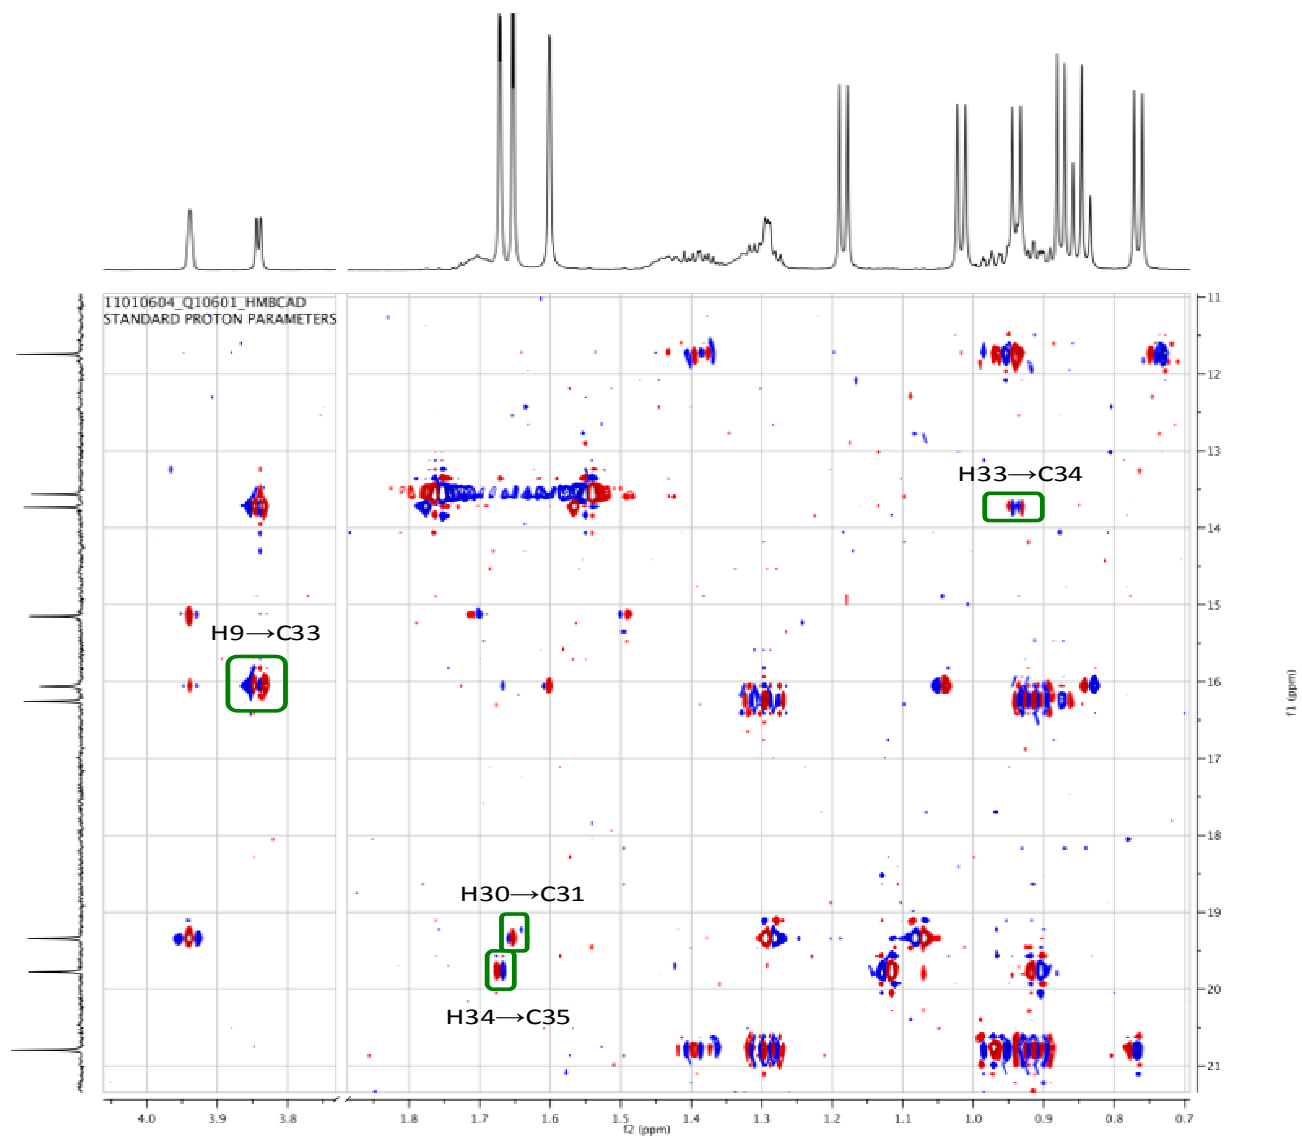

**Figure S33.** HMBC of **2** (CD<sub>3</sub>OH, 600 MHz) detail showing amide proton correlations in blue envelopes. Other correlations shown for reference.

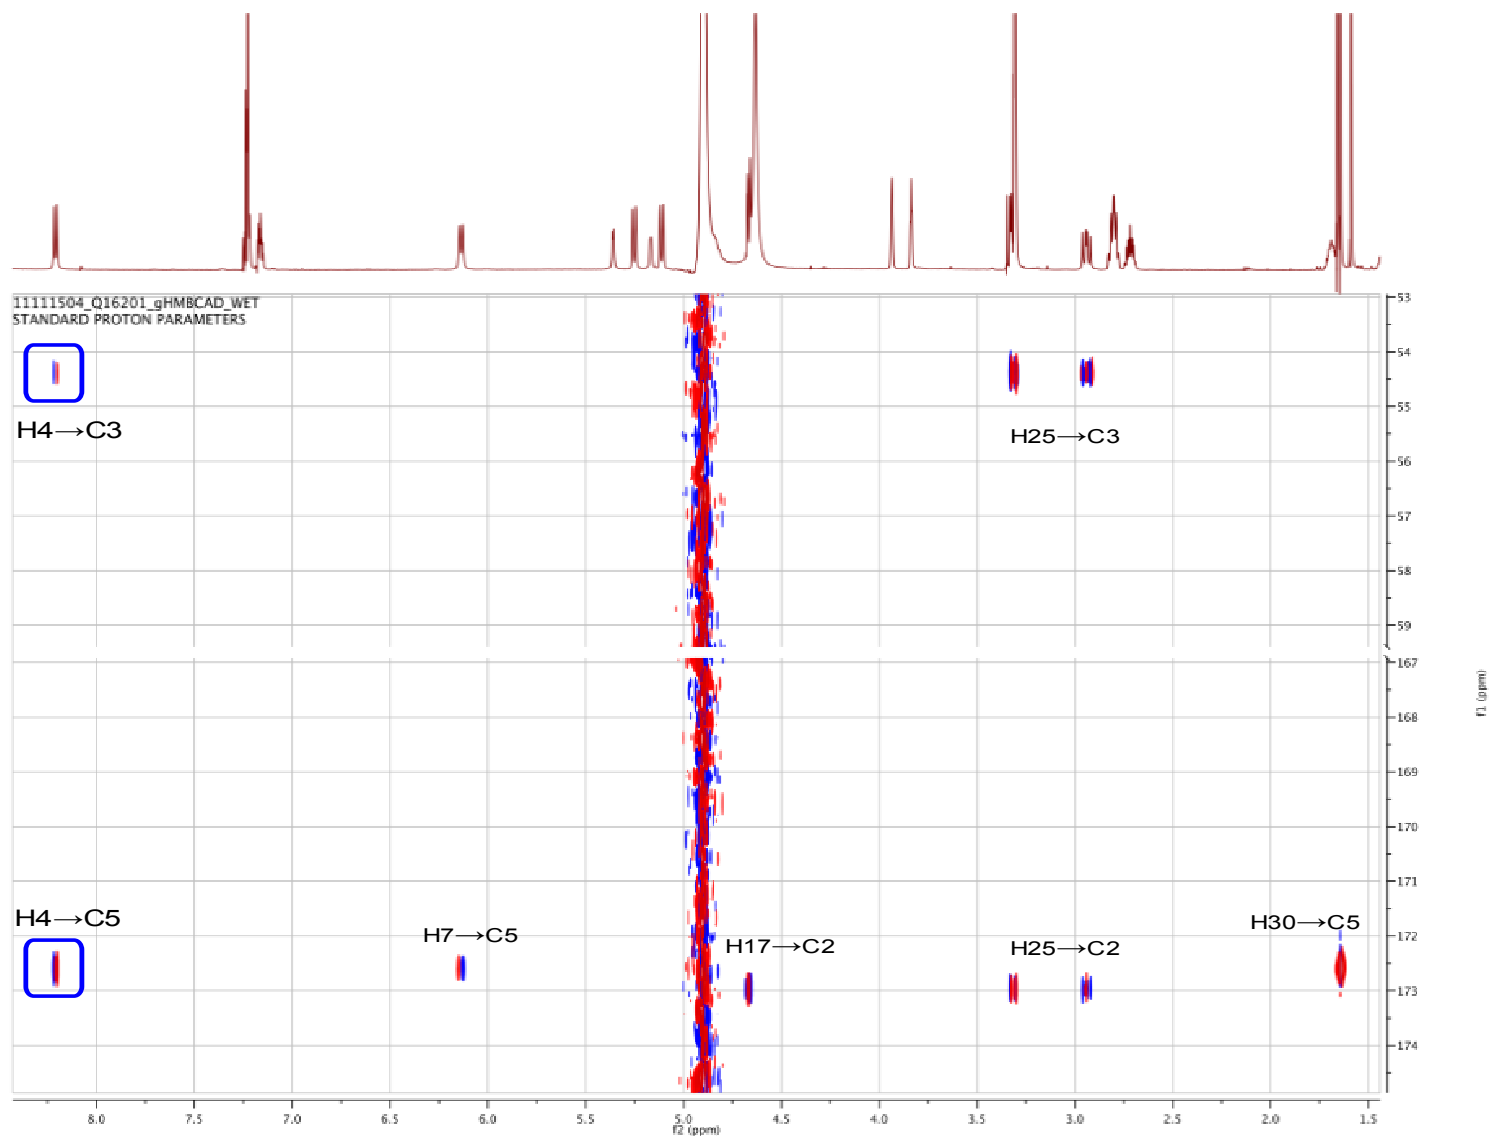

**Figure S34.** ROESY of **2** (CD<sub>3</sub>OD, 600 MHz).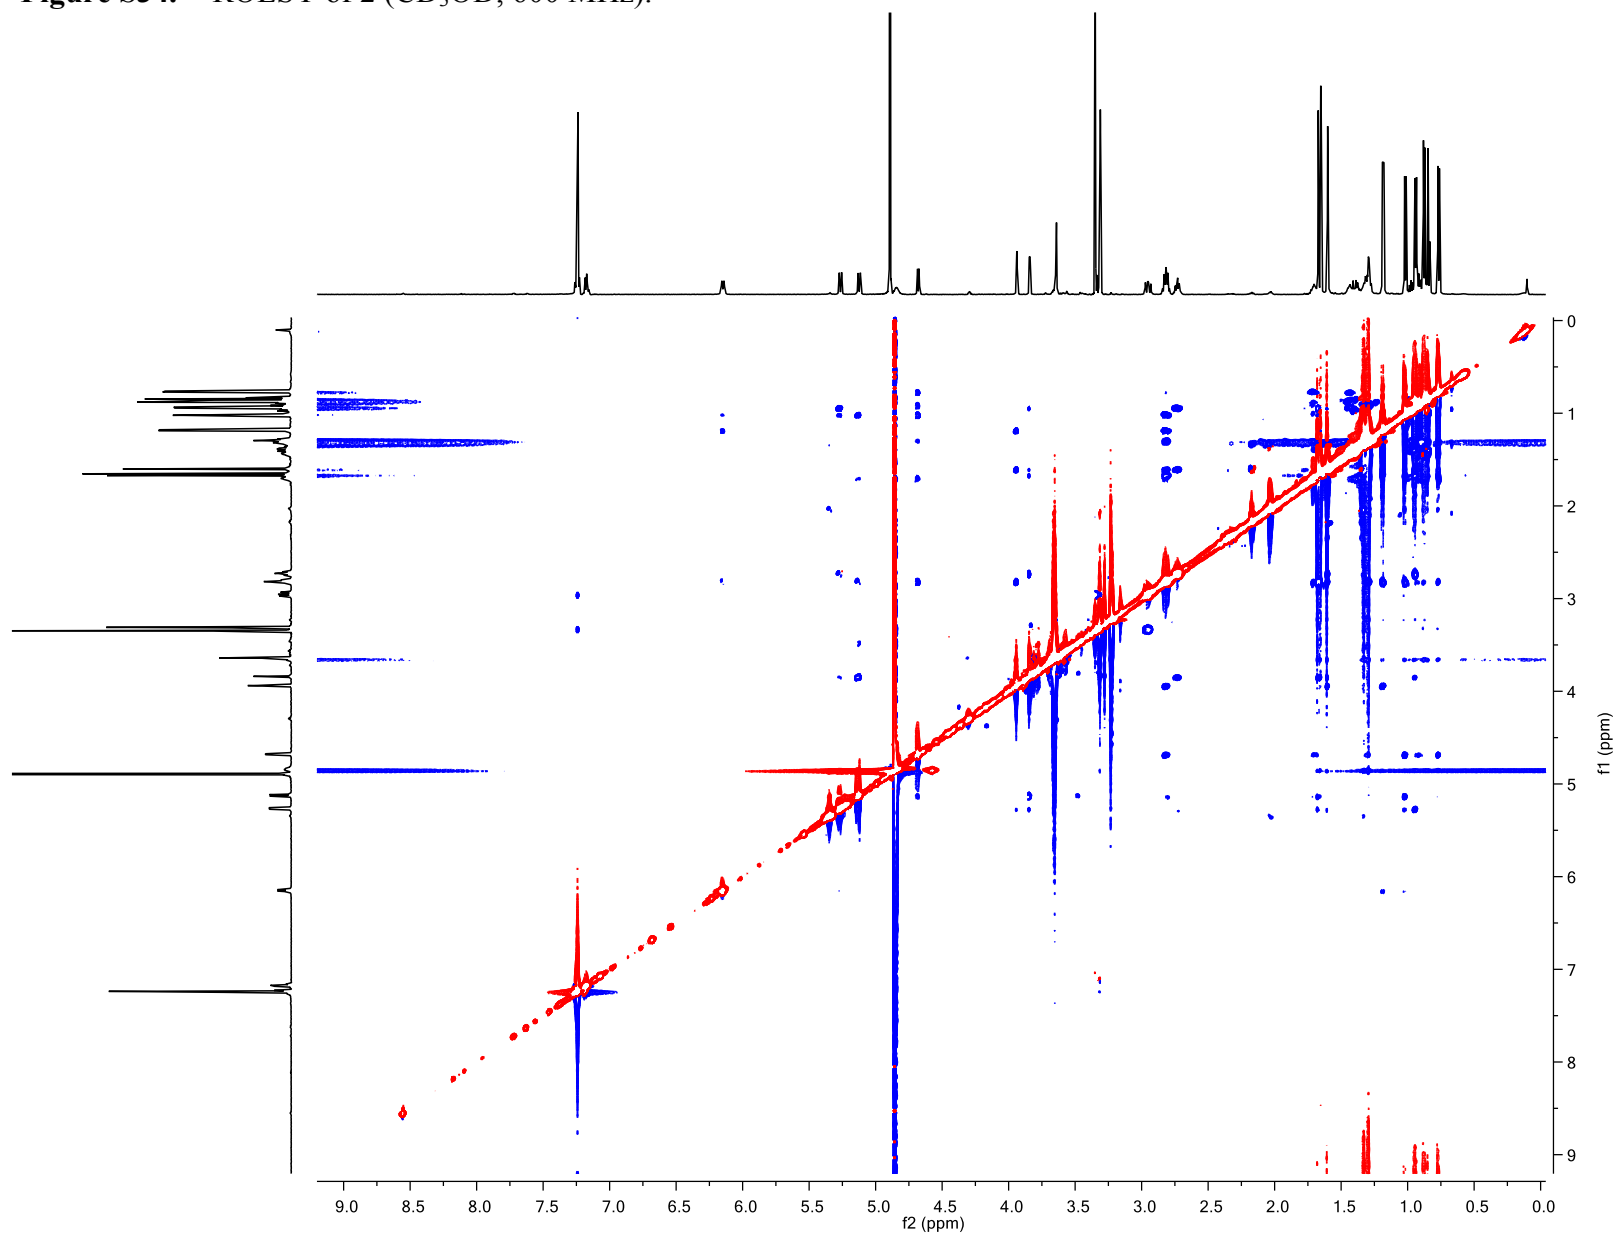

Figure S35. Chiral HPLC amino acid analysis of metacridamide A (**1**). **A**. The hydrolyzate of (**1**). **B**. Standard equimolar mixture of L-Phe ( $t_R$ : 22.2 min) and D-Phe ( $t_R$ : 24.4 min). **C**. Co-chromatography of hydrolysate and standard. **A** shows evidence of racemization (5-10%). See text for details of hydrolysis and chiral chromatography.

B

L-Phe D-Phe

C

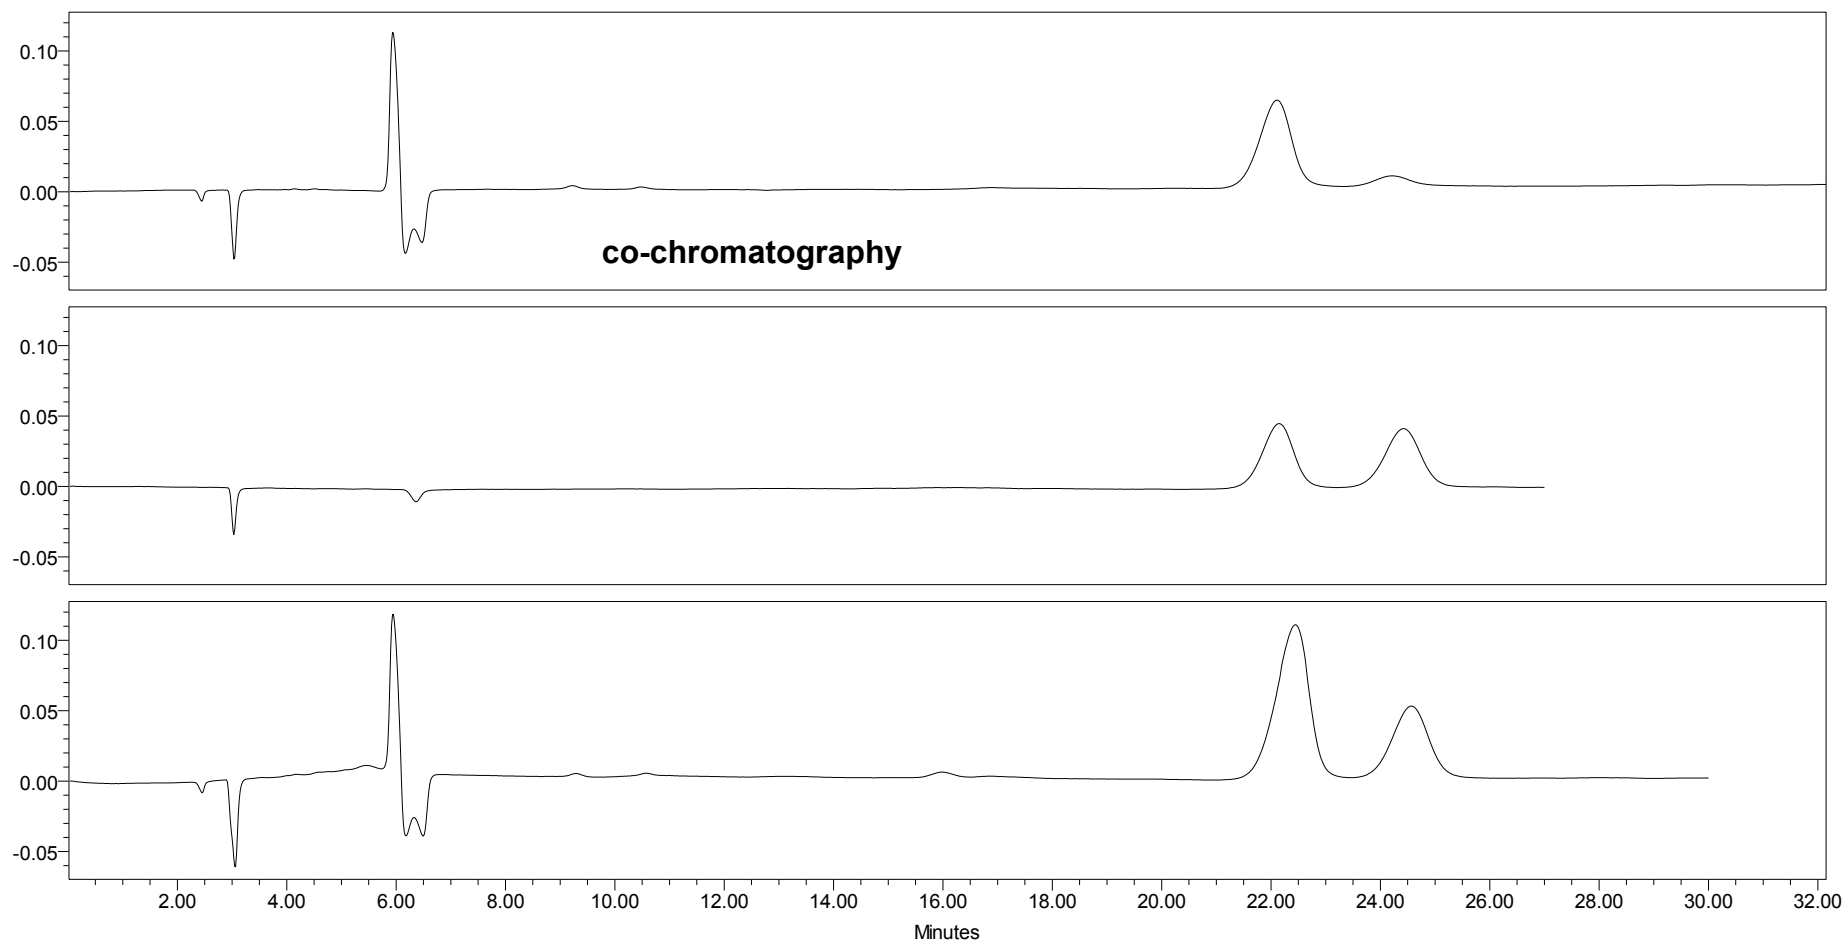



**Figure S37.** Interatomic distances (Å) from a model (Chem 3D Pro®) of the crystal structure of metacridamide A (**1**) for selected proton pairs that exhibited ROESY correlations. Chemically equivalent pairs of carbons (C27, C27'; C28 C28') proved to be magnetically equivalent (proton and carbon resonances were indiscernible). ROESY crosspeaks are unlikely for the distances shown, so alternate conformations that brought the indicated distances within 4 Å for all pairs were generated by rotations around both the  $\alpha$ - $\beta$  and  $\beta$ - $\gamma$  bonds of the Phe unit (see Figure S38 and Table S3).

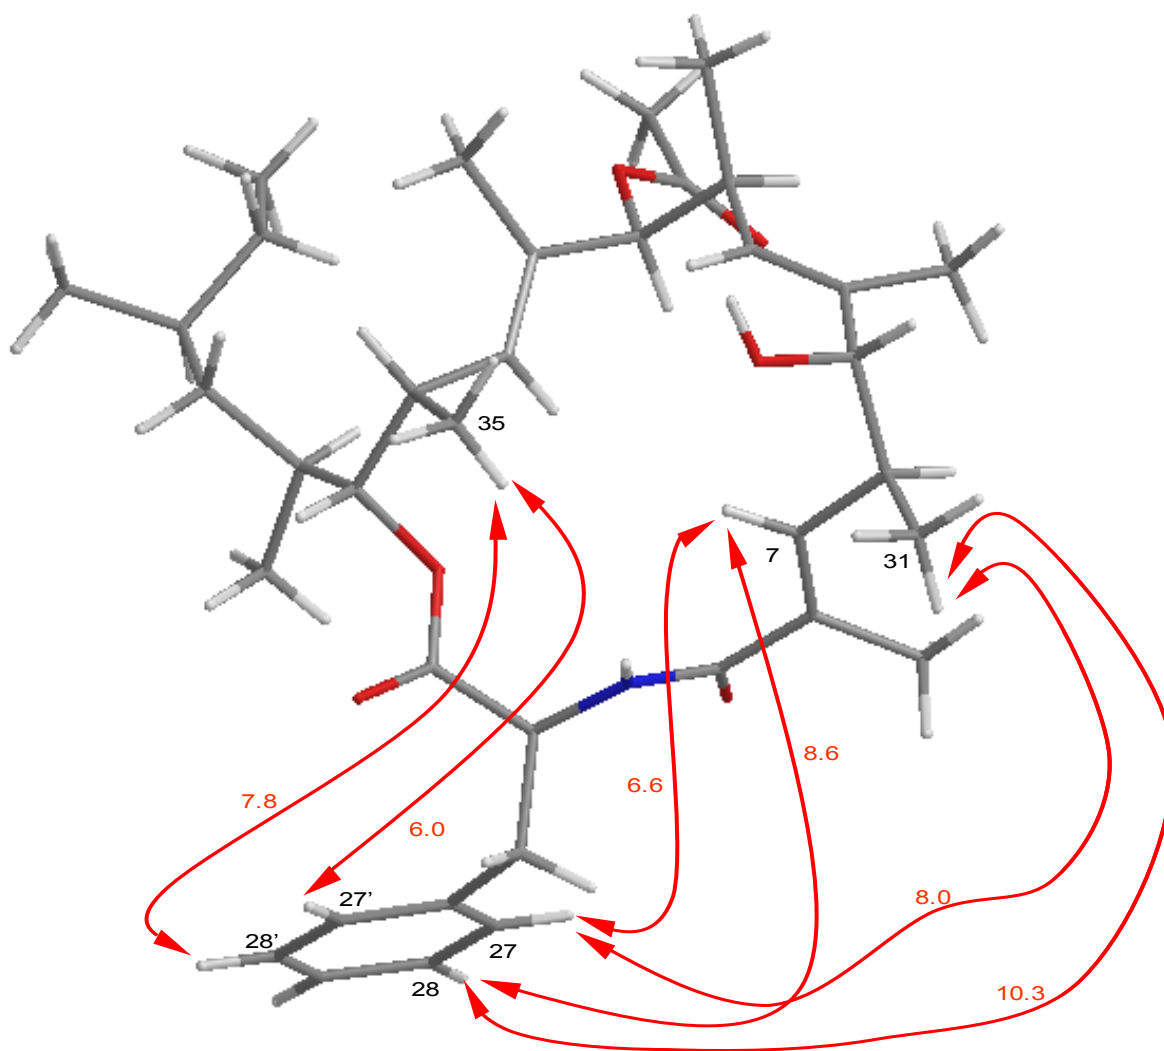

**Figure S38.** Conformers (A-C) generated by rotating the  $\alpha$ - $\beta$  and  $\beta$ - $\gamma$  bonds of the Phe unit in the crystal structure model (Figure S37) of metacridamide A (**1**).

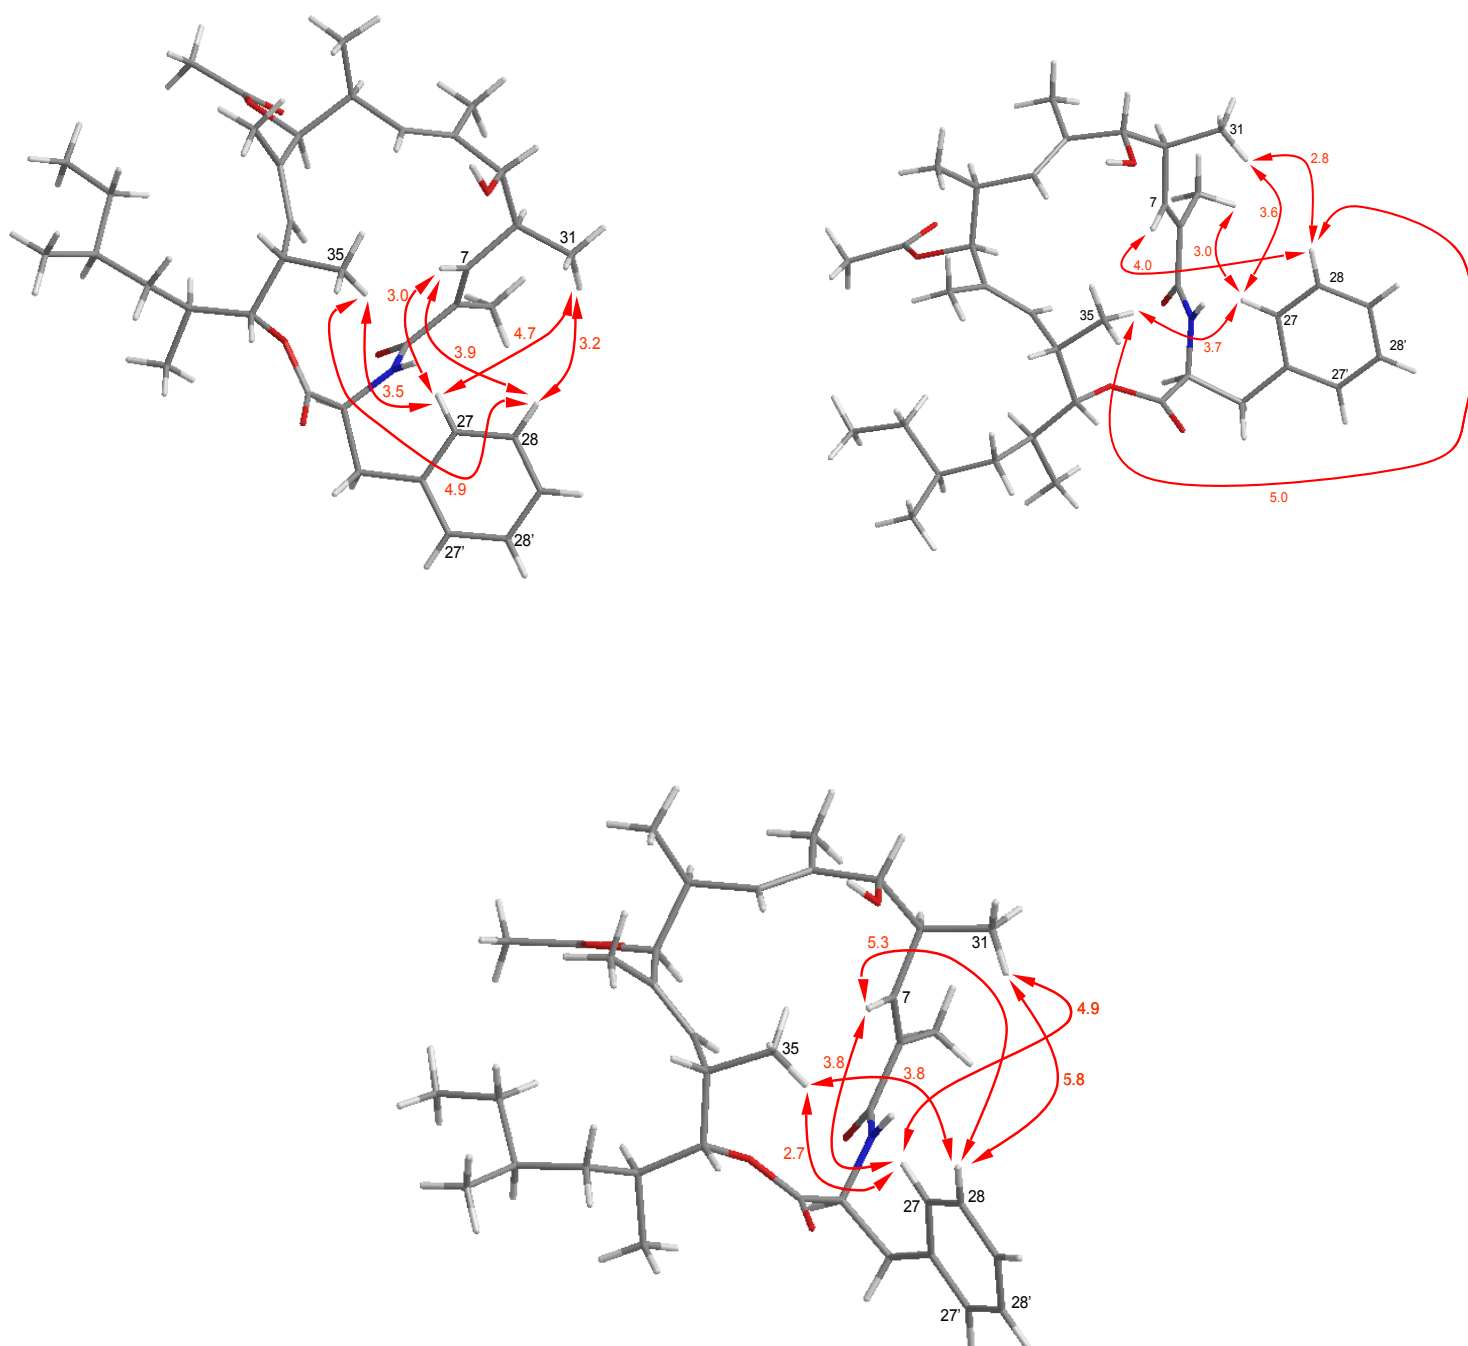



**Table S1.** Crystal data and structure refinement for metacridamide A.

|                                   |                                                                                                   |
|-----------------------------------|---------------------------------------------------------------------------------------------------|
| Identification code               | MetaA                                                                                             |
| Empirical formula                 | C <sub>37</sub> H <sub>55</sub> N O <sub>6</sub>                                                  |
| Formula weight                    | 609.82                                                                                            |
| Temperature                       | 100(2) K                                                                                          |
| Wavelength                        | 0.91770 Å                                                                                         |
| Crystal system, space group       | Orthorhombic, P 2 <sub>1</sub> 2 <sub>1</sub> 2 <sub>1</sub>                                      |
| Unit cell dimensions              | a = 12.480(3) Å    alpha = 90°<br>b = 13.140(3) Å    beta = 90°<br>c = 21.920(4) Å    gamma = 90° |
| Volume                            | 3594.6(12) Å <sup>3</sup>                                                                         |
| Z, Calculated density             | 4, 1.127 Mg/m <sup>3</sup>                                                                        |
| Absorption coefficient            | 0.075 mm <sup>-1</sup>                                                                            |
| F(000)                            | 1328                                                                                              |
| Crystal size                      | 0.10 x 0.01 x 0.01 mm <sup>3</sup>                                                                |
| Theta range for data collection   | 2.40 to 30.64°                                                                                    |
| Limiting indices                  | -13<=h<=13, -14<=k<=14, -22<=l<=22                                                                |
| Reflections collected / unique    | 15222 / 4991 [R <sub>(int)</sub> = 0.0432]                                                        |
| Completeness to theta = 30.64     | 96.4 %                                                                                            |
| Max. and min. transmission        | 0.9996 and 0.9925                                                                                 |
| Refinement method                 | Full-matrix least-squares on F <sup>2</sup>                                                       |
| Data / restraints / parameters    | 4991 / 0 / 398                                                                                    |
| Goodness-of-fit on F <sup>2</sup> | 1.056                                                                                             |
| Final R indices [I>2σ(I)]         | R1 = 0.0497, wR2 = 0.1287                                                                         |
| R indices (all data)              | R1 = 0.0531, wR2 = 0.1315                                                                         |
| Absolute structure parameter      | 0.0(12)                                                                                           |
| Extinction coefficient            | 0.034(3)                                                                                          |
| Largest diff. peak and hole       | 0.236 and -0.198 e <sup>-</sup> /Å <sup>3</sup>                                                   |

**Table S2.** Atomic coordinates ( $\times 10^4$ ) and equivalent isotropic displacement parameters ( $\text{\AA}^2 \times 10^3$ ) for metacridamide A (**1**).  $U(\text{eq})$  is defined as one third of the trace of the orthogonalized  $U_{ij}$  tensor.

|        | x        | y        | z        | $U(\text{eq})$ |
|--------|----------|----------|----------|----------------|
| O(1)   | 1286(2)  | 8356(1)  | 8485(1)  | 32(1)          |
| C(2)   | 1009(2)  | 7633(2)  | 8087(1)  | 33(1)          |
| O(2)   | 412(2)   | 7744(2)  | 7669(1)  | 47(1)          |
| C(3)   | 1581(2)  | 6651(2)  | 8263(1)  | 31(1)          |
| C(25)  | 1551(2)  | 5866(2)  | 7746(1)  | 36(1)          |
| C(26)  | 2349(2)  | 6165(2)  | 7256(1)  | 34(1)          |
| C(27)  | 2044(2)  | 6693(2)  | 6741(1)  | 38(1)          |
| C(28)  | 2795(3)  | 7045(2)  | 6332(2)  | 45(1)          |
| C(29)  | 3867(3)  | 6872(3)  | 6429(2)  | 48(1)          |
| C(28') | 4188(3)  | 6332(3)  | 6940(2)  | 53(1)          |
| C(27') | 3427(3)  | 5986(3)  | 7350(2)  | 46(1)          |
| N(4)   | 1171(2)  | 6268(2)  | 8839(1)  | 30(1)          |
| C(5)   | 1861(2)  | 5946(2)  | 9273(1)  | 32(1)          |
| O(3)   | 2835(2)  | 5932(2)  | 9190(1)  | 38(1)          |
| C(6)   | 1395(2)  | 5595(2)  | 9867(1)  | 32(1)          |
| C(30)  | 1973(3)  | 4716(2)  | 10158(2) | 45(1)          |
| C(7)   | 570(2)   | 6070(2)  | 10122(1) | 35(1)          |
| C(8)   | 50(2)    | 5783(2)  | 10717(1) | 35(1)          |
| C(31)  | -768(2)  | 4933(2)  | 10619(2) | 41(1)          |
| C(9)   | -458(2)  | 6705(2)  | 11034(1) | 38(1)          |
| O(4)   | -1221(2) | 7105(2)  | 10622(1) | 40(1)          |
| C(10)  | 382(2)   | 7466(2)  | 11246(1) | 37(1)          |
| C(32)  | 1089(3)  | 7082(3)  | 11758(2) | 59(1)          |
| C(11)  | 466(2)   | 8382(2)  | 11009(1) | 37(1)          |
| C(12)  | 1251(2)  | 9210(2)  | 11168(1) | 36(1)          |
| C(33)  | 679(3)   | 10061(3) | 11522(2) | 45(1)          |
| C(13)  | 1838(2)  | 9553(2)  | 10588(1) | 33(1)          |
| O(5)   | 2606(1)  | 10360(1) | 10744(1) | 33(1)          |
| C(131) | 3563(2)  | 10069(2) | 10962(1) | 35(1)          |
| O(132) | 3812(2)  | 9202(2)  | 11059(1) | 39(1)          |
| C(132) | 4283(2)  | 10968(2) | 11074(2) | 47(1)          |
| C(14)  | 1146(2)  | 9948(2)  | 10079(1) | 32(1)          |
| C(34)  | 575(3)   | 10943(3) | 10159(2) | 50(1)          |
| C(15)  | 1000(2)  | 9362(2)  | 9590(1)  | 34(1)          |
| C(16)  | 243(2)   | 9518(2)  | 9064(1)  | 34(1)          |
| C(35)  | -715(2)  | 8802(3)  | 9124(2)  | 45(1)          |
| C(17)  | 808(2)   | 9370(2)  | 8450(1)  | 32(1)          |
| C(18)  | 1717(2)  | 10103(2) | 8305(1)  | 33(1)          |
| C(19)  | 1310(2)  | 11193(2) | 8203(2)  | 39(1)          |
| C(20)  | 2172(2)  | 12004(2) | 8339(2)  | 46(1)          |
| C(21)  | 2293(3)  | 12178(2) | 9022(2)  | 55(1)          |
| C(22)  | 3255(3)  | 12809(3) | 9212(3)  | 79(1)          |
| C(23)  | 2357(3)  | 9761(2)  | 7752(2)  | 44(1)          |
| C(24)  | 1920(3)  | 12992(2) | 8003(2)  | 63(1)          |

**Table S3.** Summary of interatomic distances (Å) for indicated proton pairs in the crystal structure of metacridamide A(**1**) and in models of conformers A-C (Figures S37-38). The last column shows the minimum distance achieved for the indicated proton pair among the three conformers.

| <b>Proton Pairs</b> | <b>XTAL</b> | <b>A</b> | <b>B</b> | <b>C</b> | <b>MIN</b> |
|---------------------|-------------|----------|----------|----------|------------|
| 27↔35               | 6.0         | 3.5      | 3.7      | 2.7      | 2.7        |
| 27↔7                | 6.6         | 3.0      | 3.0      | 3.8      | 3.0        |
| 27↔31               | 8.0         | 4.7      | 3.6      | 4.9      | 3.6        |
| 28↔35               | 7.8         | 4.9      | 5.0      | 3.8      | 3.8        |
| 28↔7                | 8.6         | 3.9      | 4.0      | 5.3      | 3.9        |
| 28↔31               | 10.3        | 3.2      | 2.8      | 5.8      | 2.8        |
